# Supplementary material for: Rh(ii)-Catalyzed formation of pyrrolo[2,3-b]quinolines from azide-methylenecyclopropanes and isonitriles
Source: Royal Society of Chemistry journal article supplement (doi:10.1039/c5cc09236a), 2015-12-03
Supplement: c5cc09236a1.pdf [file c5cc09236a1.pdf]

# Supporting Information

## Rh(II)-Catalyzed Formation of Pyrrolo[2,3-b]quinolines from Azide-MCPs and Isonitriles

Kai Chen,<sup>a</sup> Xiang-Ying Tang<sup>\*b</sup> and Min Shi<sup>\*a,b</sup>.

<sup>a</sup>Key Laboratory for Advanced Materials and Institute of Fine Chemicals, East China University of Science and Technology, 130 Mei Long Road, Shanghai 200237 China.

<sup>b</sup>State Key Laboratory of Organometallic Chemistry, Shanghai Institute of Organic Chemistry, Chinese Academy of Sciences, 354 Fenglin Lu, Shanghai 200032 China. [sioexiangying@mail.sioc.ac.cn](mailto:sioexiangying@mail.sioc.ac.cn); [Mshi@mail.sioc.ac.cn](mailto:Mshi@mail.sioc.ac.cn). Fax: 86-21-64166128

### CONTENTS

|                                                                                                                                                                                         |    |
|-----------------------------------------------------------------------------------------------------------------------------------------------------------------------------------------|----|
| General procedure for the synthesis of compounds <b>2</b> .....                                                                                                                         | 3  |
| Spectroscopic data for all products <b>2</b> .....                                                                                                                                      | 4  |
| Typical procedure for the synthesis of compound <b>2a</b> from Staudinger reduction.....                                                                                                | 17 |
| Control experiment on how to get compounds <b>2a'</b> and <b>2a''</b> .....                                                                                                             | 18 |
| Typical procedure for the synthesis of catalysts Rh <sub>2</sub> (esp) <sub>2</sub> (CN <sup>t</sup> Bu) <sub>2</sub> and Rh <sub>2</sub> (esp) <sub>2</sub> (CN <sup>n</sup> Bu) ..... | 20 |
| Transformation of compounds <b>2a</b> and <b>2k</b> .....                                                                                                                               | 22 |
| The crystal data of <b>2d</b> and <b>2a'</b> .....                                                                                                                                      | 25 |

### **General remarks**

Dichloromethane was freshly distilled from calcium hydride; THF, Et<sub>2</sub>O and toluene were distilled from sodium (Na) under argon (Ar) atmosphere. Melting points were determined on a digital melting point apparatus and temperatures were uncorrected. <sup>1</sup>H NMR and <sup>13</sup>C NMR spectra were recorded on a Bruker AM-300 or AM-400 spectrophotometers. Infrared spectra were recorded on a Perkin-Elmer PE-983 spectrometer with absorption in cm<sup>-1</sup>. Flash column chromatography was performed using 300-400 mesh silica gel. For thin-layer chromatography (TLC), silica gel plates (Huanghai GF254) were used. Mass spectra were recorded by EI, and HRMS were measured on a HP-5989 instrument.

## General procedure for the synthesis of compounds **2**

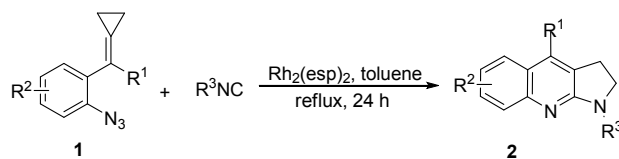

A solution of compound **1** (0.2 mmol), isonitrile (1.0 mmol) and  $Rh_2(esp)_2$  (4.5 mg, 0.006 mmol) in dry toluene (2 mL) was stirred at 110 °C for 24 h. Then the solvent was removed under reduced pressure and the residue was purified by silica gel flash chromatography (eluent: petroleum ether / ethyl acetate = 30 / 1) to afford the product **2** in moderate to high yield.

## Spectroscopic data for all products 2

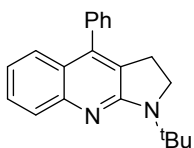

**Compound 2a:** 48 mg, 80%, A yellow solid, m.p. 144-146 °C; IR (CH<sub>2</sub>Cl<sub>2</sub>):  $\nu$  3060, 2971, 1628, 1429, 1312, 762, 702 cm<sup>-1</sup>; <sup>1</sup>H NMR (400 MHz, CDCl<sub>3</sub>, TMS):  $\delta$  1.59 (s, 9H), 2.81 (t,  $J = 7.6$  Hz, 2H), 3.58 (t,  $J = 7.6$  Hz, 2H), 7.04 (dd,  $J_1 = J_2 = 7.6$  Hz, 1H), 7.33 (d,  $J = 8.0$  Hz, 3H), 7.39-7.43 (m, 2H), 7.47-7.50 (m, 2H), 7.70 (d,  $J = 8.4$  Hz, 1H); <sup>13</sup>C NMR (100 MHz, CDCl<sub>3</sub>, TMS):  $\delta$  24.8, 27.1, 46.4, 54.4, 121.4, 123.0, 125.0, 125.3, 126.9, 127.6, 127.8, 128.5, 129.2, 136.8, 140.6, 148.3, 161.3; MS (ESI)  $m/z$ : 303.2 (M+H<sup>+</sup>, 100); HRMS (ESI) Calcd. for C<sub>21</sub>H<sub>23</sub>N<sub>2</sub><sup>+</sup> requires: 303.1856, found: 303.1856.

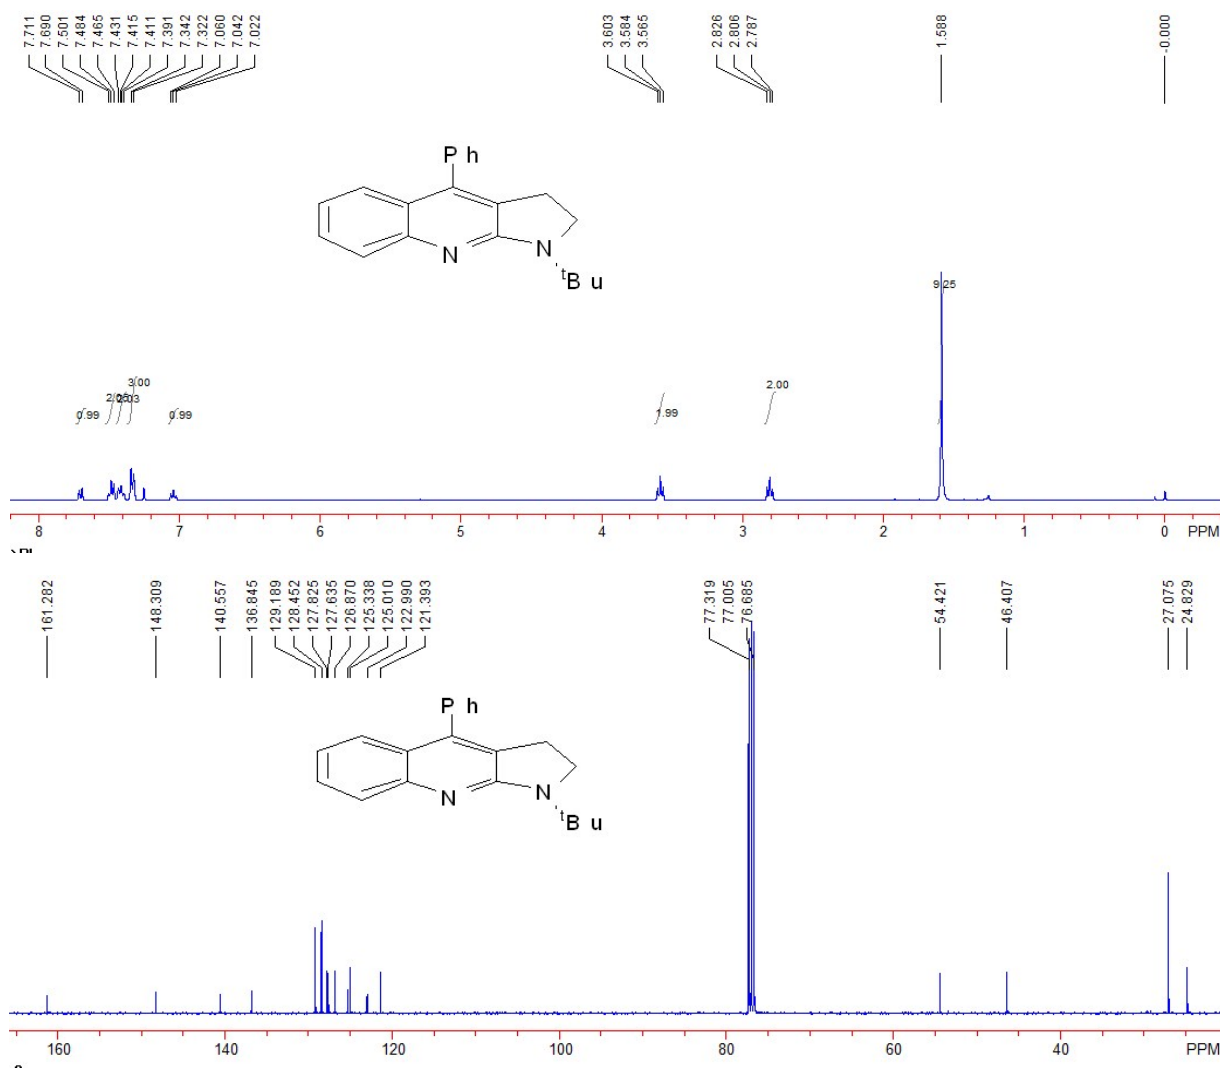

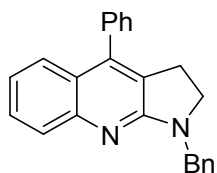

**Compound 2b:** 48 mg, 71%, A yellow solid, m.p. 147-149 °C; IR (CH<sub>2</sub>Cl<sub>2</sub>):  $\nu$  3061, 2924, 1629, 1576, 1443, 1311, 763, 701 cm<sup>-1</sup>; <sup>1</sup>H NMR (400 MHz, CDCl<sub>3</sub>, TMS):  $\delta$  2.90 (t, *J* = 7.6 Hz, 2H), 3.45 (t, *J* = 7.6 Hz, 2H), 4.80 (s, 2H), 7.06-7.10 (m, 1H), 7.27-7.51 (m, 12H), 7.74 (d, *J* = 8.4 Hz, 1H); <sup>13</sup>C NMR (100 MHz, CDCl<sub>3</sub>, TMS):  $\delta$  24.9, 47.9, 48.7, 121.6, 123.7, 123.9, 125.3, 126.0, 127.2, 127.8, 128.3, 128.51, 128.53, 129.1, 136.6, 137.7, 141.9, 148.4, 160.9; MS (ESI) *m/z*: 337.2 (M+H<sup>+</sup>, 100); HRMS (ESI) Calcd. for C<sub>24</sub>H<sub>21</sub>N<sub>2</sub><sup>+</sup> requires: 337.1699, found: 337.1699.

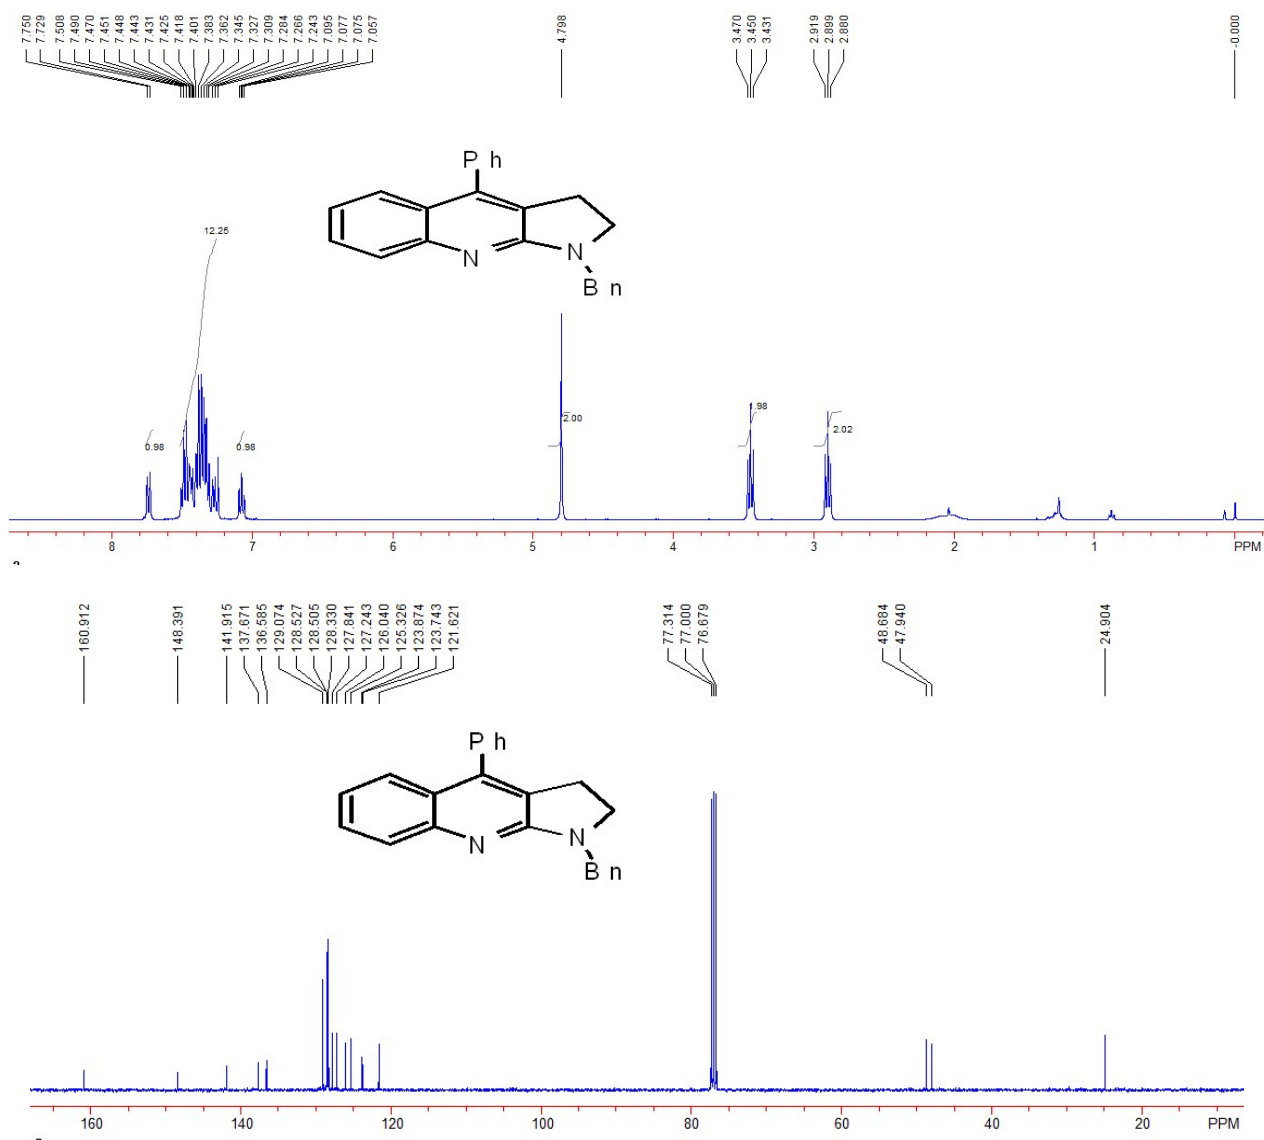

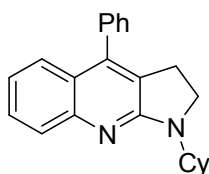

**Compound 2c:** 48 mg, 73%, A yellow solid, m.p. 192-194 °C; IR (CH<sub>2</sub>Cl<sub>2</sub>):  $\nu$  2925, 2852, 1726, 1630, 1440, 1311, 761, 702 cm<sup>-1</sup>; <sup>1</sup>H NMR (400 MHz, CDCl<sub>3</sub>, TMS):  $\delta$  1.13-1.91 (m, 10H), 2.89 (t,  $J$  = 7.6 Hz, 2H), 3.57 (t,  $J$  = 7.6 Hz, 2H), 4.27-4.32 (m, 1H), 7.02 (dd,  $J_1$  =  $J_2$  = 7.2 Hz, 1H), 7.30-7.50 (m, 7H), 7.69 (d,  $J$  = 8.4 Hz, 1H); <sup>13</sup>C NMR (100 MHz, CDCl<sub>3</sub>, TMS):  $\delta$  24.9, 25.6, 25.8, 29.8, 43.3, 51.6, 121.1, 123.5, 124.6, 125.2, 125.7, 127.7, 128.1, 128.5, 129.1, 136.7, 141.2, 148.5, 160.1; MS (ESI)  $m/z$ : 329.2 (M+H<sup>+</sup>, 100); HRMS (ESI) Calcd. for C<sub>23</sub>H<sub>25</sub>N<sub>2</sub><sup>+</sup> requires: 329.2012, found: 329.2016.

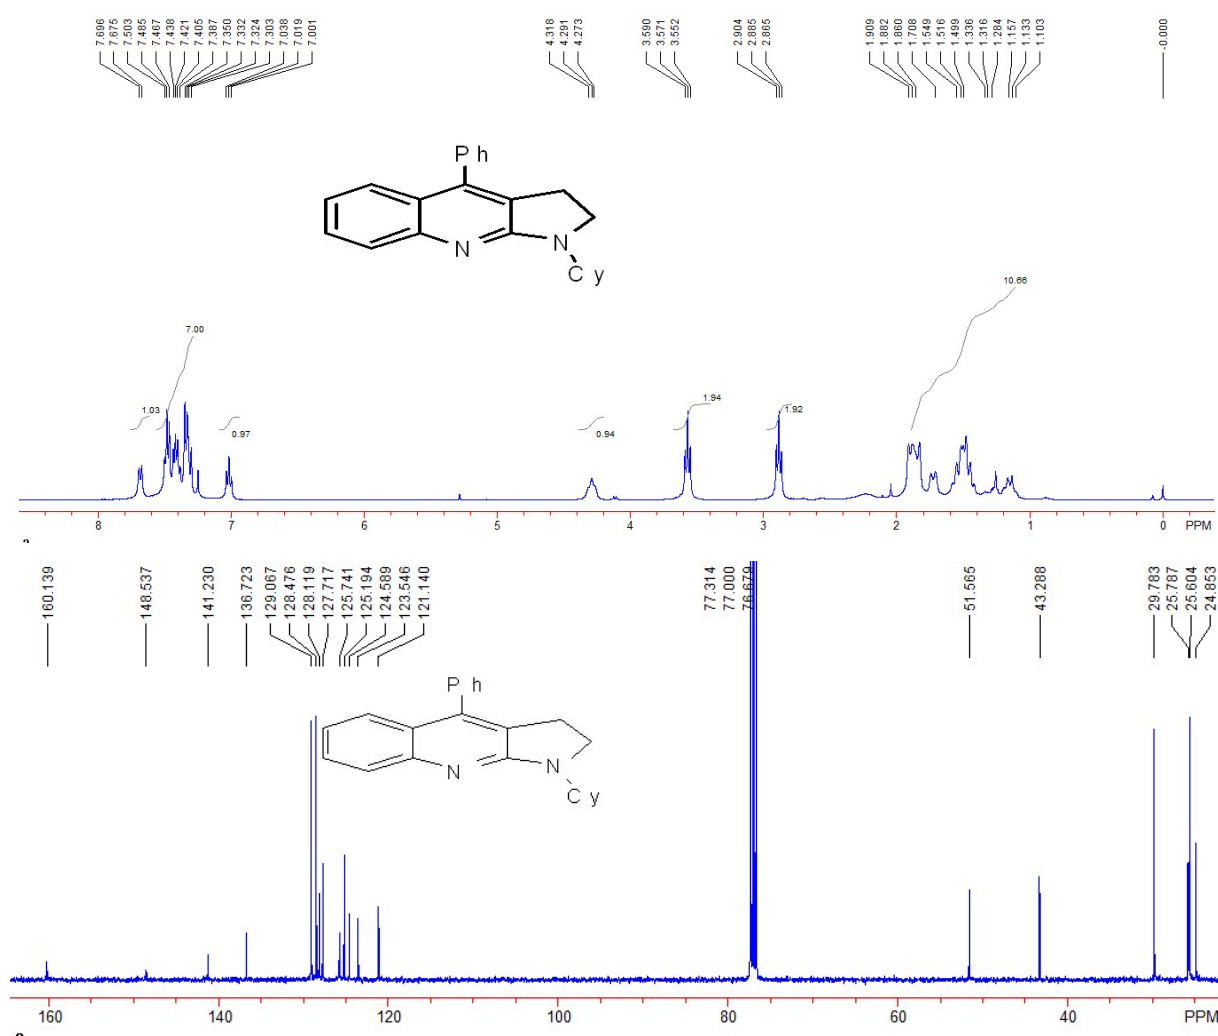

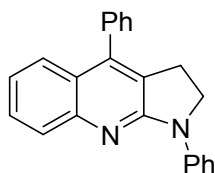

**Compound 2d:** 36 mg, 56%, A yellow solid, m.p. 186-188 °C; IR (CH<sub>2</sub>Cl<sub>2</sub>):  $\nu$  3062, 2923, 1596, 1499, 1318, 753, 702 cm<sup>-1</sup>; <sup>1</sup>H NMR (400 MHz, CDCl<sub>3</sub>, TMS):  $\delta$  3.10 (t,  $J$  = 8.0 Hz, 2H), 4.12 (t,  $J$  = 8.0 Hz, 2H), 7.08 (dd,  $J_1 = J_2 = 7.2$  Hz, 1H), 7.15-7.19 (m, 1H), 7.39-7.55 (m, 9H), 7.87 (d,  $J$  = 8.0 Hz, 1H), 8.08 (d,  $J$  = 7.6 Hz, 2H); <sup>13</sup>C NMR (100 MHz, CDCl<sub>3</sub>, TMS):  $\delta$  24.4, 48.4, 117.9, 121.9, 122.8, 123.9, 124.8, 125.1, 127.3, 128.0, 128.4, 128.6, 128.8, 129.1, 136.4, 141.9, 142.4, 147.7, 158.0; MS (ESI)  $m/z$ : 323.2 (M+H<sup>+</sup>, 100); HRMS (ESI) Calcd. for C<sub>23</sub>H<sub>19</sub>N<sub>2</sub><sup>+</sup> requires: 323.1543, found: 323.1544.

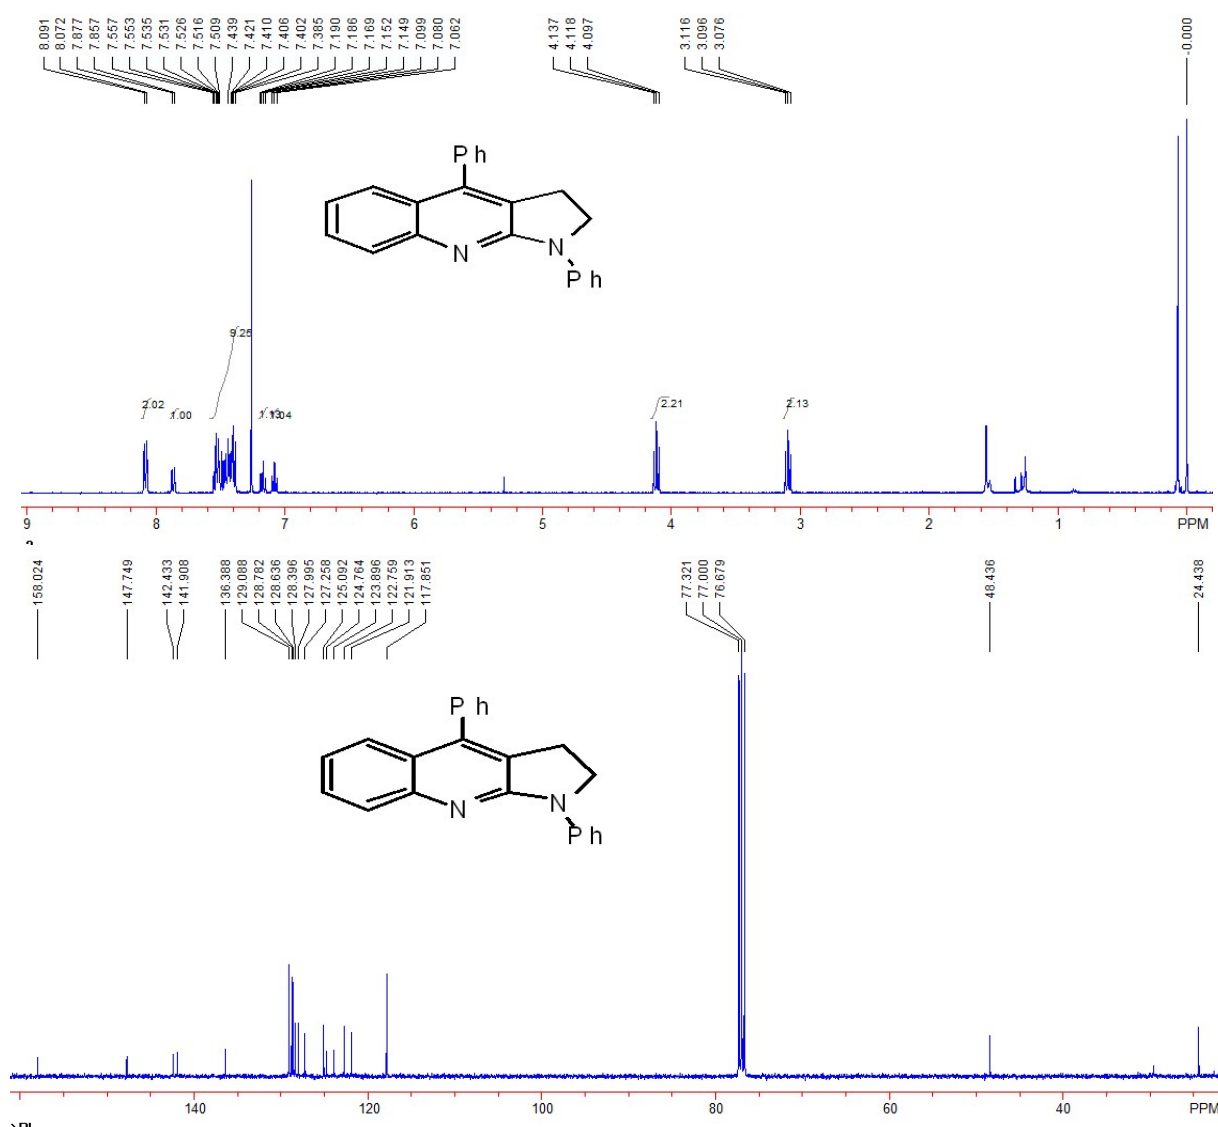

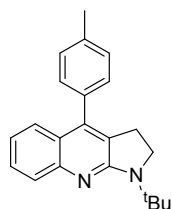

**Compound 2e:** 39 mg, 62%, A yellow solid, m.p. 143-145 °C; IR (CH<sub>2</sub>Cl<sub>2</sub>):  $\nu$  2968, 2922, 2852, 1627, 1429, 1315, 816, 759 cm<sup>-1</sup>; <sup>1</sup>H NMR (400 MHz, CDCl<sub>3</sub>, TMS):  $\delta$  1.58 (s, 9H), 2.44 (s, 3H), 2.81 (t, *J* = 7.6 Hz, 2H), 3.58 (t, *J* = 7.6 Hz, 2H), 7.02-7.06 (m, 1H), 7.23 (d, *J* = 8.0 Hz, 2H), 7.29 (d, *J* = 8.0 Hz, 2H), 7.35-7.42 (m, 2H), 7.70 (d, *J* = 8.0 Hz, 1H); <sup>13</sup>C NMR (100 MHz, CDCl<sub>3</sub>, TMS):  $\delta$  21.3, 24.9, 27.1, 46.4, 54.4, 121.3, 123.1, 125.1, 125.3, 126.8, 127.8, 129.09, 129.14, 133.8, 137.3, 140.6, 148.3, 161.3; MS (ESI) *m/z*: 317.2 (M+H<sup>+</sup>, 100); HRMS (ESI) Calcd. for C<sub>22</sub>H<sub>25</sub>N<sub>2</sub><sup>+</sup> requires: 317.2012, found: 317.2013.

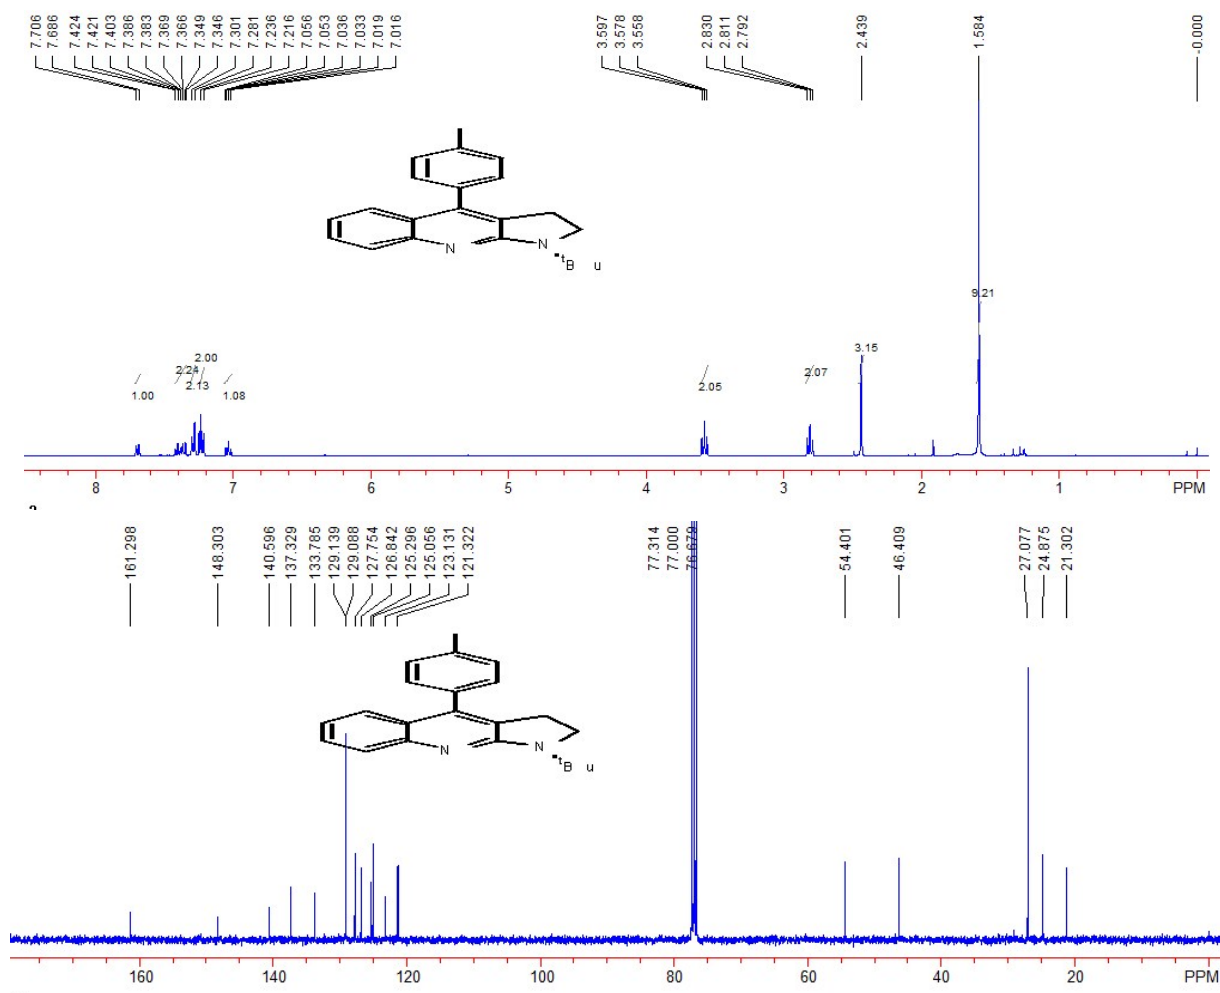



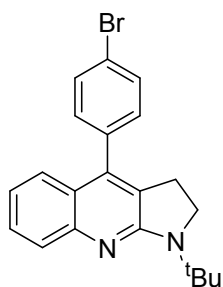

**Compound 2f:** 61 mg, 80%, A yellow solid, m.p. 196-198 °C; IR (CH<sub>2</sub>Cl<sub>2</sub>):  $\nu$  3062, 2971, 1630, 1571, 1429, 1313, 759 cm<sup>-1</sup>; <sup>1</sup>H NMR (400 MHz, CDCl<sub>3</sub>, TMS):  $\delta$  1.58 (s, 9H), 2.78 (t,  $J$  = 7.6 Hz, 2H), 3.59 (t,  $J$  = 7.6 Hz, 2H), 7.03-7.07 (m, 1H), 7.21 (d,  $J$  = 8.4 Hz, 2H), 7.28 (d,  $J$  = 8.0 Hz, 1H), 7.39-7.43 (m, 1H), 7.61 (d,  $J$  = 8.4 Hz, 2H), 7.70 (d,  $J$  = 8.0 Hz, 1H); <sup>13</sup>C NMR (100 MHz, CDCl<sub>3</sub>, TMS):  $\delta$  24.8, 27.0, 46.4, 54.5, 121.5, 121.8, 122.6, 124.6, 125.4, 127.0, 128.0, 130.9, 131.7, 135.7, 139.3, 148.3, 161.1; MS (ESI)  $m/z$ : 381.1 (M+H<sup>+</sup>, 100); HRMS (ESI) Calcd. for C<sub>21</sub>H<sub>22</sub>BrN<sub>2</sub><sup>+</sup> requires: 381.0961, found: 381.0961.

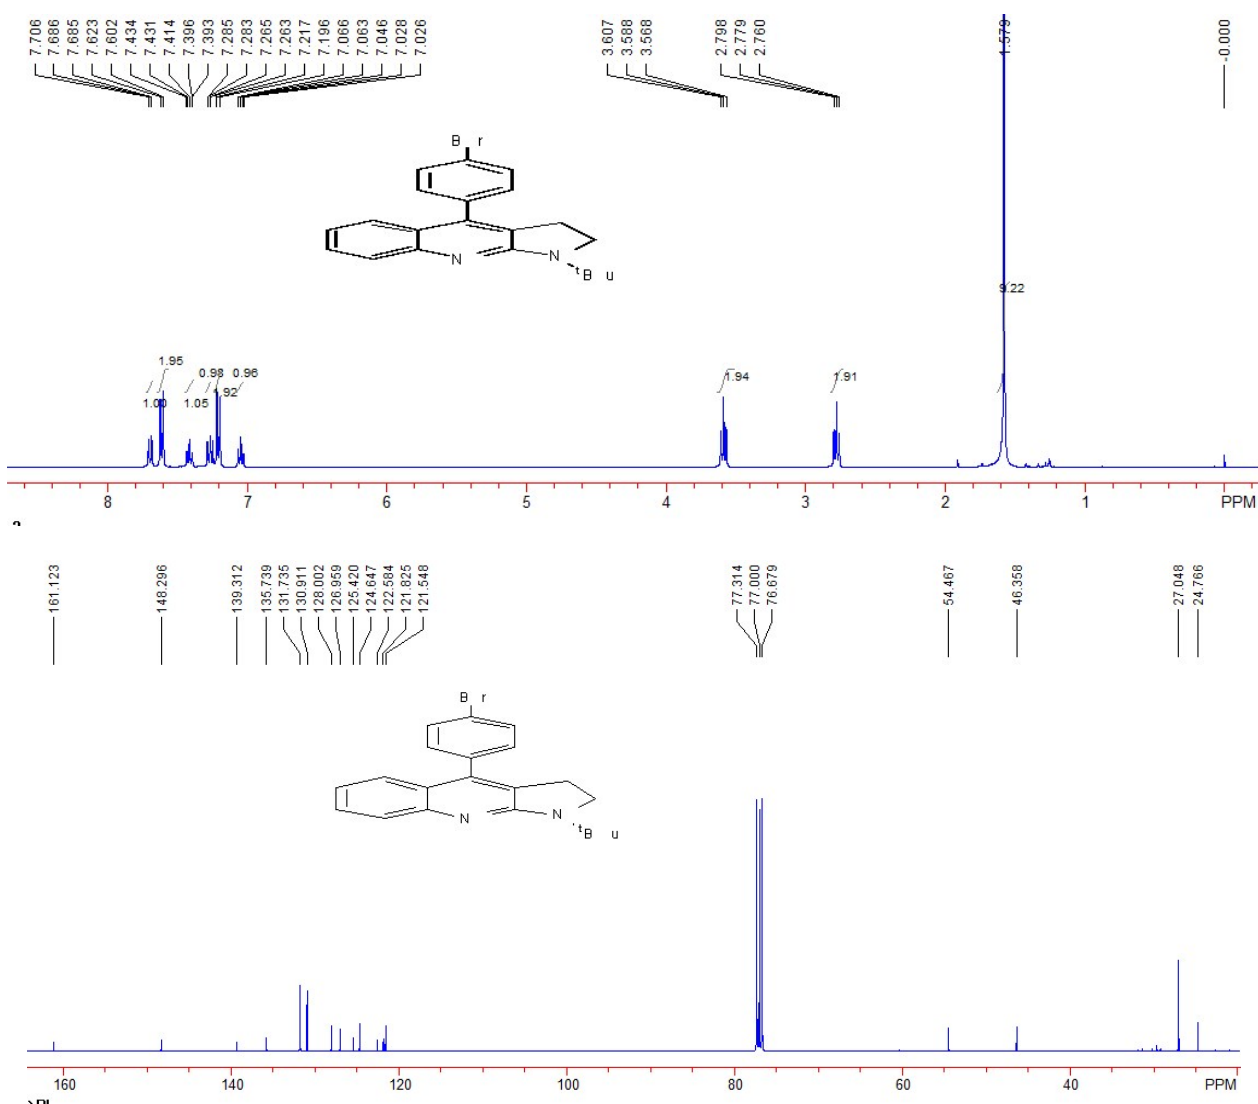

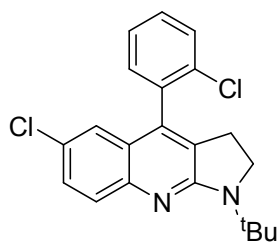

**Compound 2g:** 57 mg, 77%, A yellow solid, m.p. 150-152 °C; IR (CH<sub>2</sub>Cl<sub>2</sub>):  $\nu$  2973, 1636, 1566, 1421, 1221, 1082, 735 cm<sup>-1</sup>; <sup>1</sup>H NMR (400 MHz, CDCl<sub>3</sub>, TMS):  $\delta$  1.57 (s, 9H), 2.60-2.68 (m, 1H), 2.74-2.82 (m, 1H), 3.56-3.65 (m, 2H), 7.00 (d,  $J$  = 2.0 Hz, 1H), 7.21-7.24 (m, 1H), 7.32-7.40 (m, 3H), 7.52-7.55 (m, 1H), 7.61 (d,  $J$  = 9.2 Hz, 1H); <sup>13</sup>C NMR (100 MHz, CDCl<sub>3</sub>, TMS):  $\delta$  24.5, 27.1, 46.3, 54.6, 123.5, 123.6, 126.7, 127.0, 127.5, 128.2, 128.3, 129.6, 130.0, 130.9, 133.3, 134.8, 137.1, 146.7, 161.1; MS (ESI)  $m/z$ : 371.1 (M+H<sup>+</sup>, 100); HRMS (ESI) Calcd. for C<sub>21</sub>H<sub>21</sub>Cl<sub>2</sub>N<sub>2</sub><sup>+</sup> requires: 371.1076, found: 371.1079.

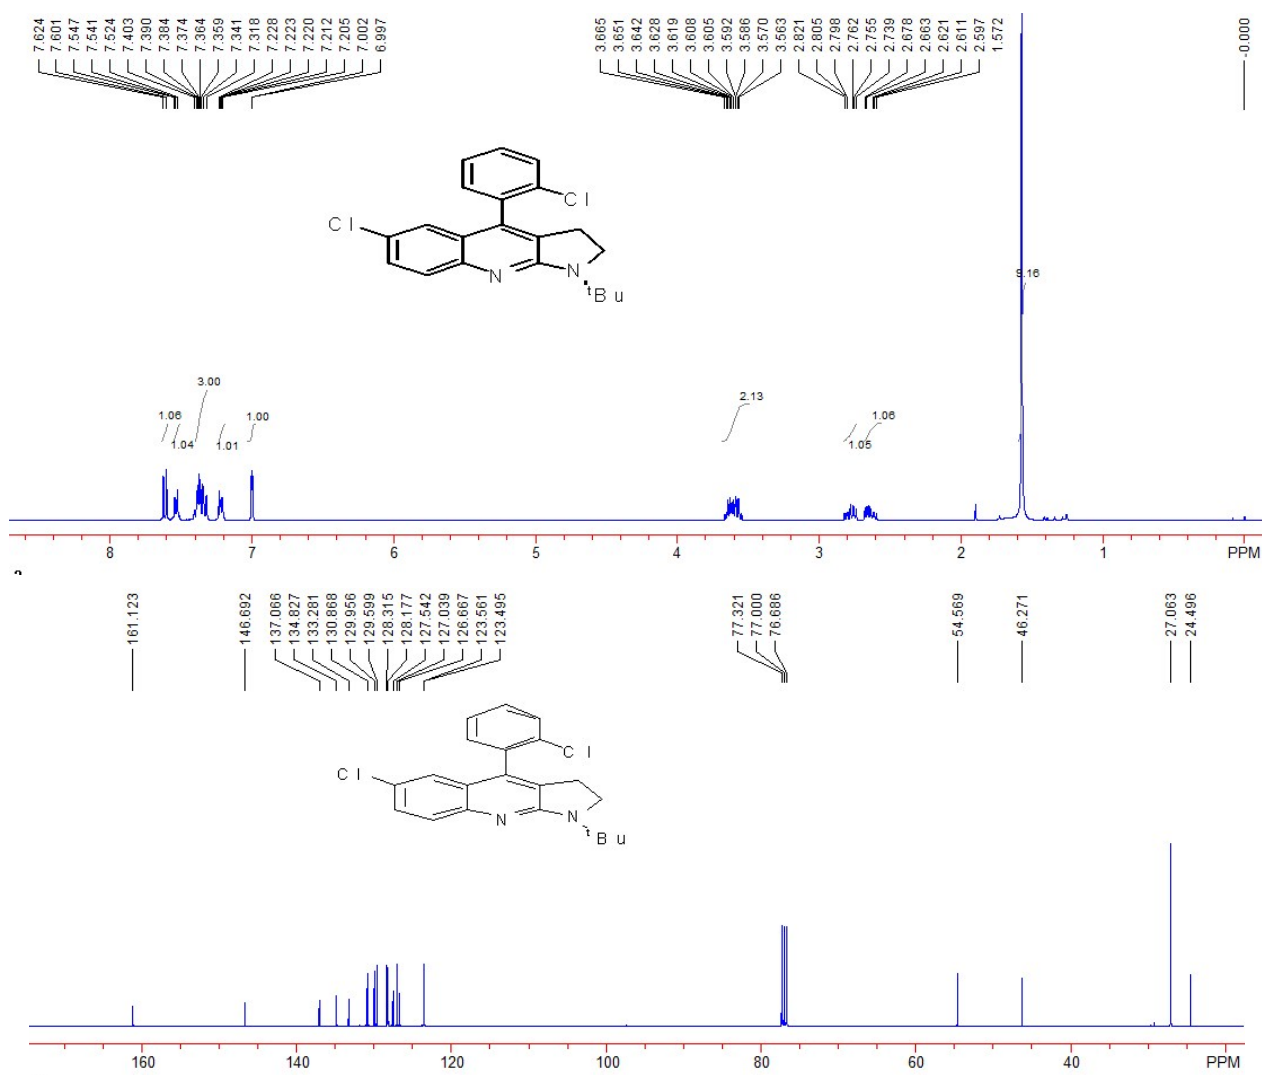

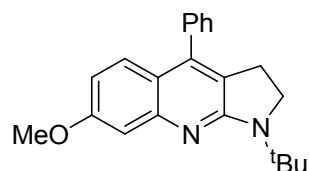

**Compound 2h:** 40 mg, 60%, A yellow solid, m.p. 140-142 °C; IR (CH<sub>2</sub>Cl<sub>2</sub>):  $\nu$  3057, 2957, 1613, 1410, 1107, 1034, 761, 703 cm<sup>-1</sup>; <sup>1</sup>H NMR (400 MHz, CDCl<sub>3</sub>, TMS):  $\delta$  1.59 (s, 9H), 2.78 (t,  $J$  = 7.6 Hz, 2H), 3.57 (t,  $J$  = 7.6 Hz, 2H), 3.91 (s, 3H), 6.70 (dd,  $J$  = 8.8 Hz,  $J$  = 2.4 Hz, 1H), 7.13 (d,  $J$  = 2.8 Hz, 1H), 7.23 (d,  $J$  = 8.8 Hz, 1H), 7.31-7.33 (m, 2H), 7.39-7.49 (m, 3H); <sup>13</sup>C NMR (100 MHz, CDCl<sub>3</sub>, TMS):  $\delta$  24.6, 27.1, 46.6, 54.4, 55.3, 107.0, 112.5, 117.4, 122.8, 126.0, 127.6, 128.4, 129.2, 137.0, 140.6, 149.9, 159.8, 161.9; MS (ESI)  $m/z$ : 333.2 (M+H<sup>+</sup>, 100); HRMS (ESI) Calcd. for C<sub>22</sub>H<sub>25</sub>N<sub>2</sub>O<sup>+</sup> requires: 333.1961, found: 333.1965.

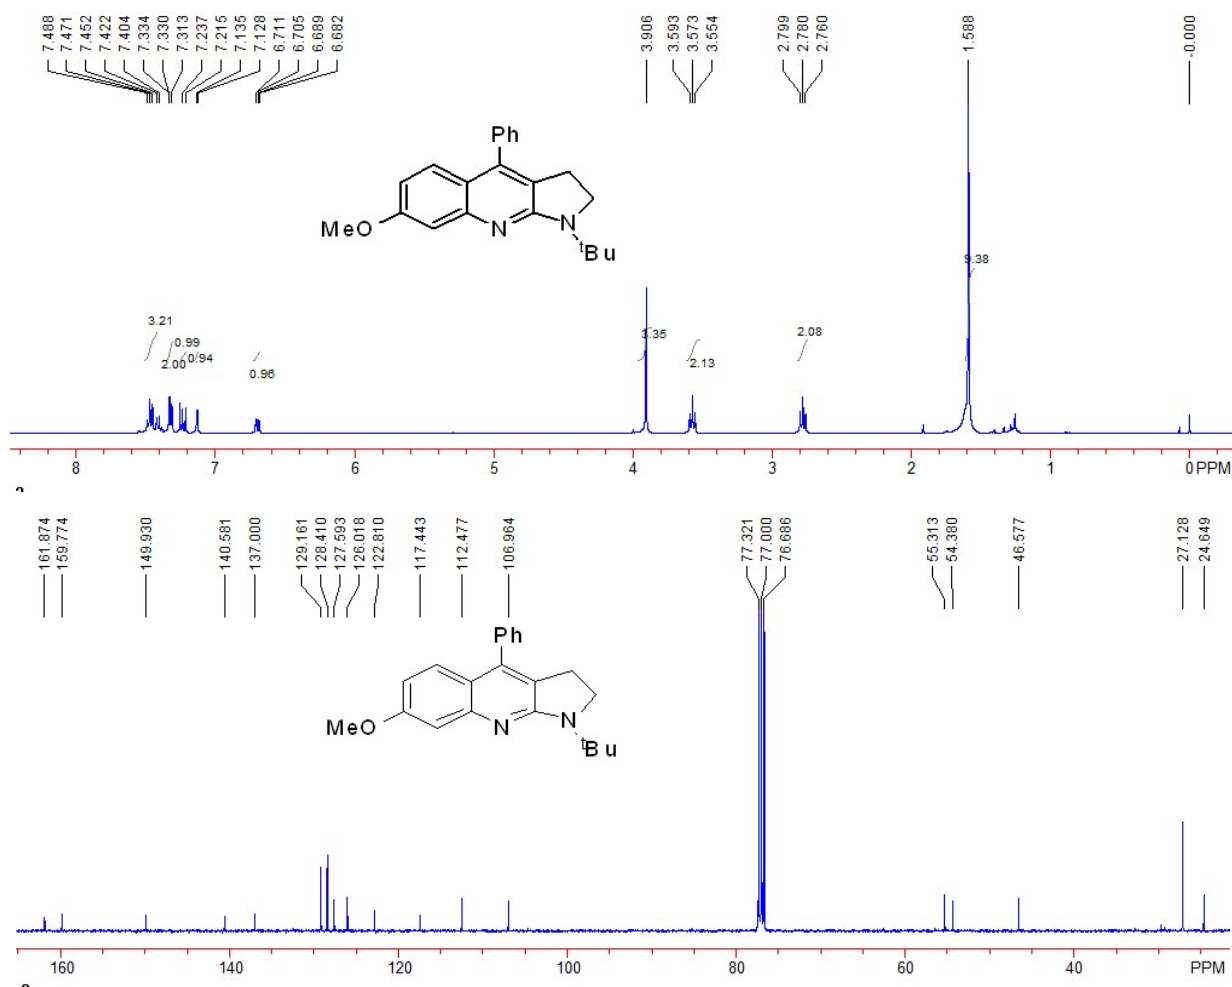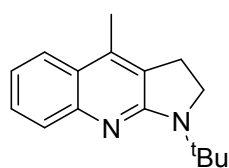

**Compound 2i:** 33 mg, 70%, A yellow solid, m.p. 108-110 °C; IR (CH<sub>2</sub>Cl<sub>2</sub>):  $\nu$  2952, 1716, 1640, 1571, 1274, 1228, 752 cm<sup>-1</sup>; <sup>1</sup>H NMR (400 MHz, CDCl<sub>3</sub>, TMS):  $\delta$  1.56 (s, 9H), 2.39 (s, 3H), 2.95 (t,  $J$  = 7.6 Hz, 2H), 3.63 (t,  $J$  = 7.6 Hz, 2H), 7.16 (dd,  $J_1 = J_2 = 7.6$  Hz, 1H), 7.41 (dd,  $J_1 = J_2 = 7.6$  Hz, 1H), 7.66 (dd,  $J_1 = J_2 = 7.6$  Hz, 2H); <sup>13</sup>C NMR (100 MHz, CDCl<sub>3</sub>, TMS):  $\delta$  14.2, 24.3, 27.1, 46.2, 54.3, 121.2, 122.7, 123.8, 125.3, 127.1, 127.6, 135.1, 148.0, 161.3; MS (ESI)  $m/z$ : 241.2 (M+H<sup>+</sup>, 100); HRMS (ESI) Calcd. for C<sub>16</sub>H<sub>21</sub>N<sub>2</sub><sup>+</sup> requires: 241.1699, found: 241.1702.

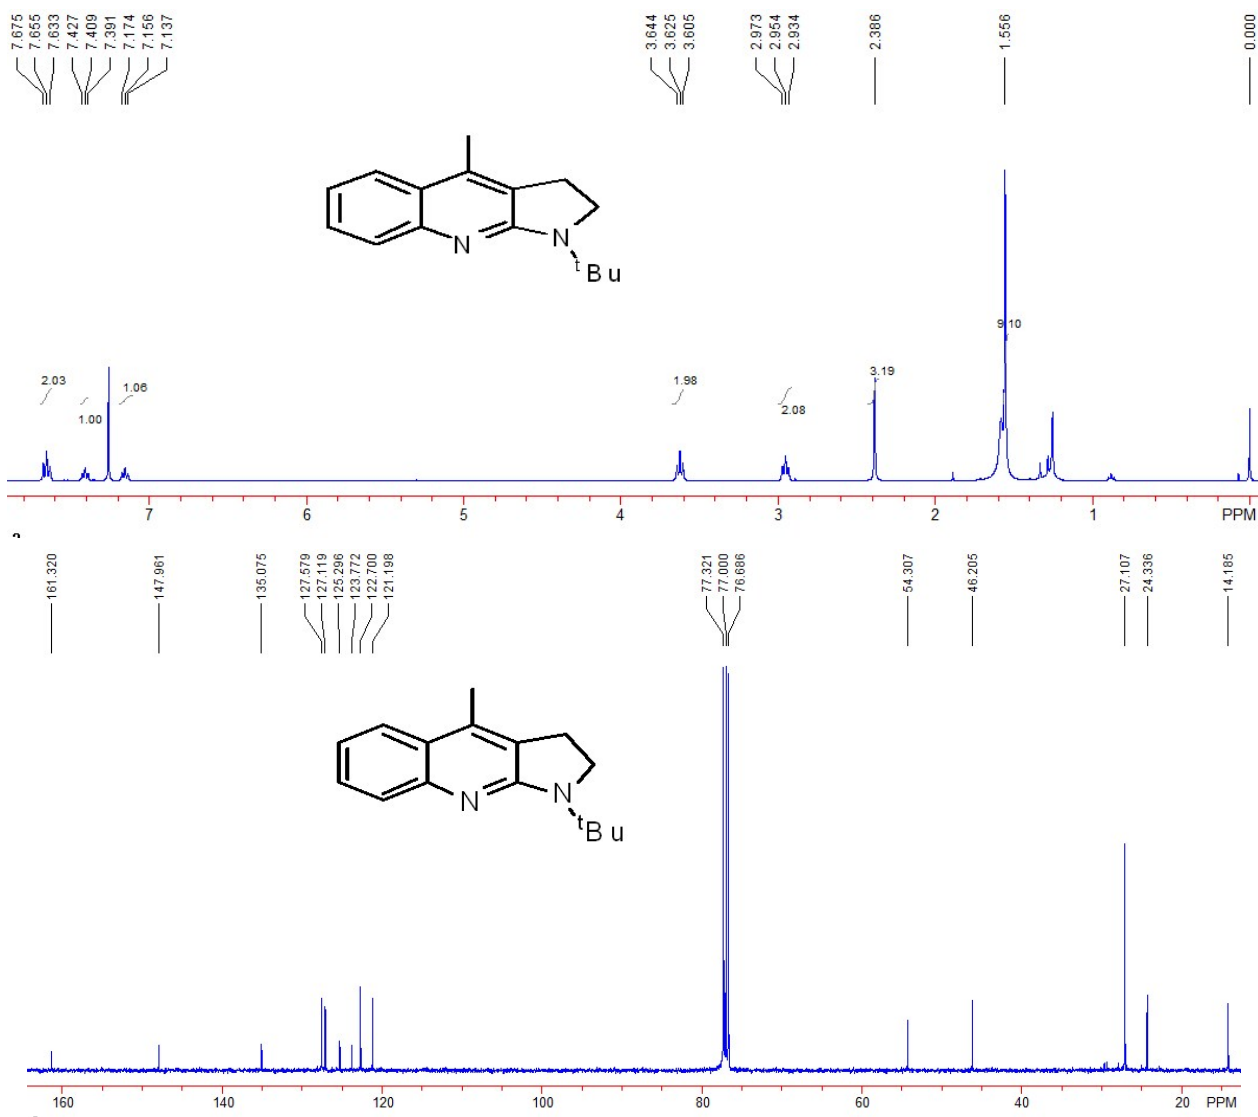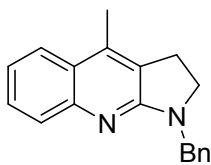

**Compound 2j:** 35 mg, 64%, A yellow solid, m.p. 143-145 °C; IR (CH<sub>2</sub>Cl<sub>2</sub>):  $\nu$  3063, 2872, 1639, 1575, 1496, 1443, 746, 701 cm<sup>-1</sup>; <sup>1</sup>H NMR (400 MHz, CDCl<sub>3</sub>, TMS):  $\delta$  2.42 (s, 3H), 3.05 (t,  $J$  = 7.6 Hz, 2H), 3.49 (t,  $J$  = 7.6 Hz, 2H), 4.76 (s, 2H), 7.18-7.22 (m, 1H), 7.27-7.37 (m, 5H), 7.43-

7.48 (m, 1H), 7.68-7.72 (m, 2H);  $^{13}\text{C}$  NMR (100 MHz,  $\text{CDCl}_3$ , TMS):  $\delta$  14.4, 24.4, 47.7, 48.5, 121.5, 123.0, 123.8, 124.4, 126.2, 127.2, 128.1, 128.2, 128.5, 136.7, 137.7, 147.9, 160.8; MS (ESI)  $m/z$ : 275.2 ( $\text{M}+\text{H}^+$ , 100); HRMS (ESI) Calcd. for  $\text{C}_{19}\text{H}_{19}\text{N}_2^+$  requires: 275.1543, found: 275.1542.

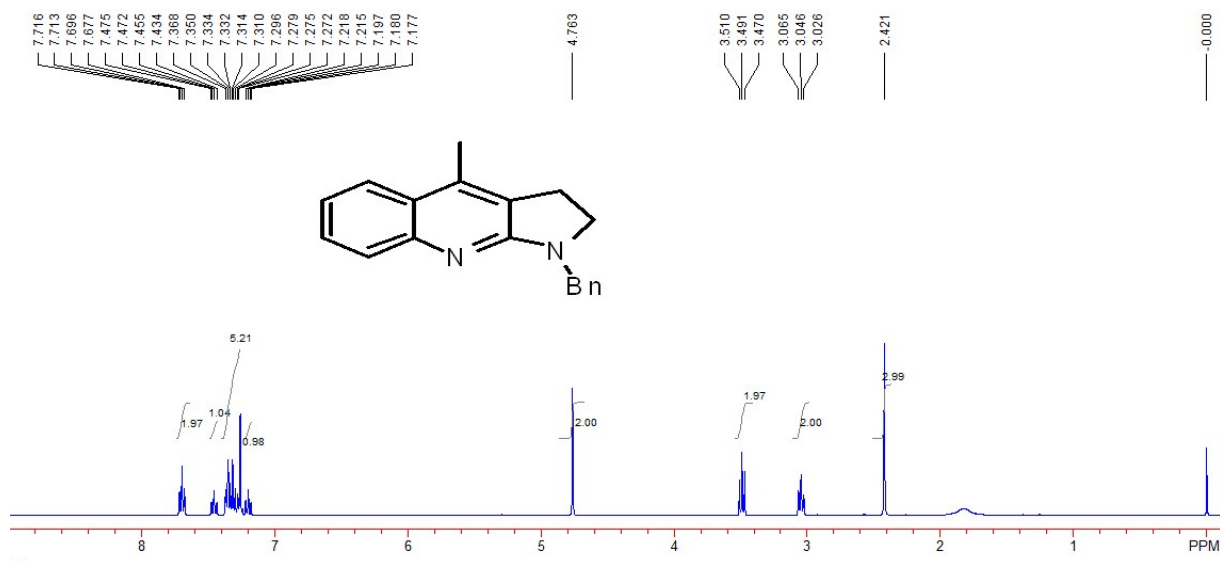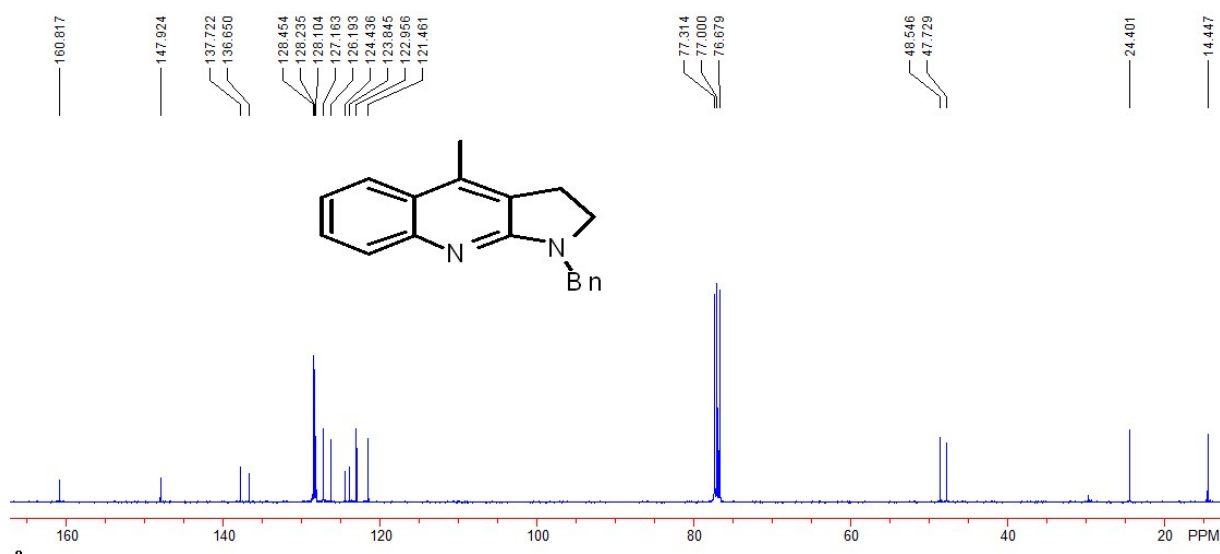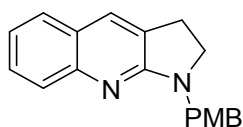

**Compound 2k:** 41 mg, 71%, A yellow solid, m.p. 88-90 °C; IR ( $\text{CH}_2\text{Cl}_2$ ):  $\nu$  3055, 2928, 1641, 1571, 1511, 1244, 754  $\text{cm}^{-1}$ ;  $^1\text{H}$  NMR (400 MHz,  $\text{CDCl}_3$ , TMS):  $\delta$  3.03-3.07 (m, 2H), 3.46 (t,  $J$  = 8.0 Hz, 2H), 3.79 (s, 3H), 4.70 (s, 2H), 6.85 (d,  $J$  = 8.8 Hz, 2H), 7.13-7.17 (m, 1H), 7.25-7.30 (m, 2H), 7.46-7.50 (m, 3H), 7.68 (d,  $J$  = 8.4 Hz, 1H);  $^{13}\text{C}$  NMR (100 MHz,  $\text{CDCl}_3$ , TMS):  $\delta$  25.1,

47.8, 48.0, 55.2, 113.9, 121.6, 124.2, 125.8, 126.2, 127.1, 128.3, 129.6, 129.7, 147.9, 158.9, 161.4; MS (ESI)  $m/z$ : 291.1 ( $M+H^+$ , 100); HRMS (ESI) Calcd. for  $C_{19}H_{19}N_2O^+$  requires: 291.1492, found: 291.1492.

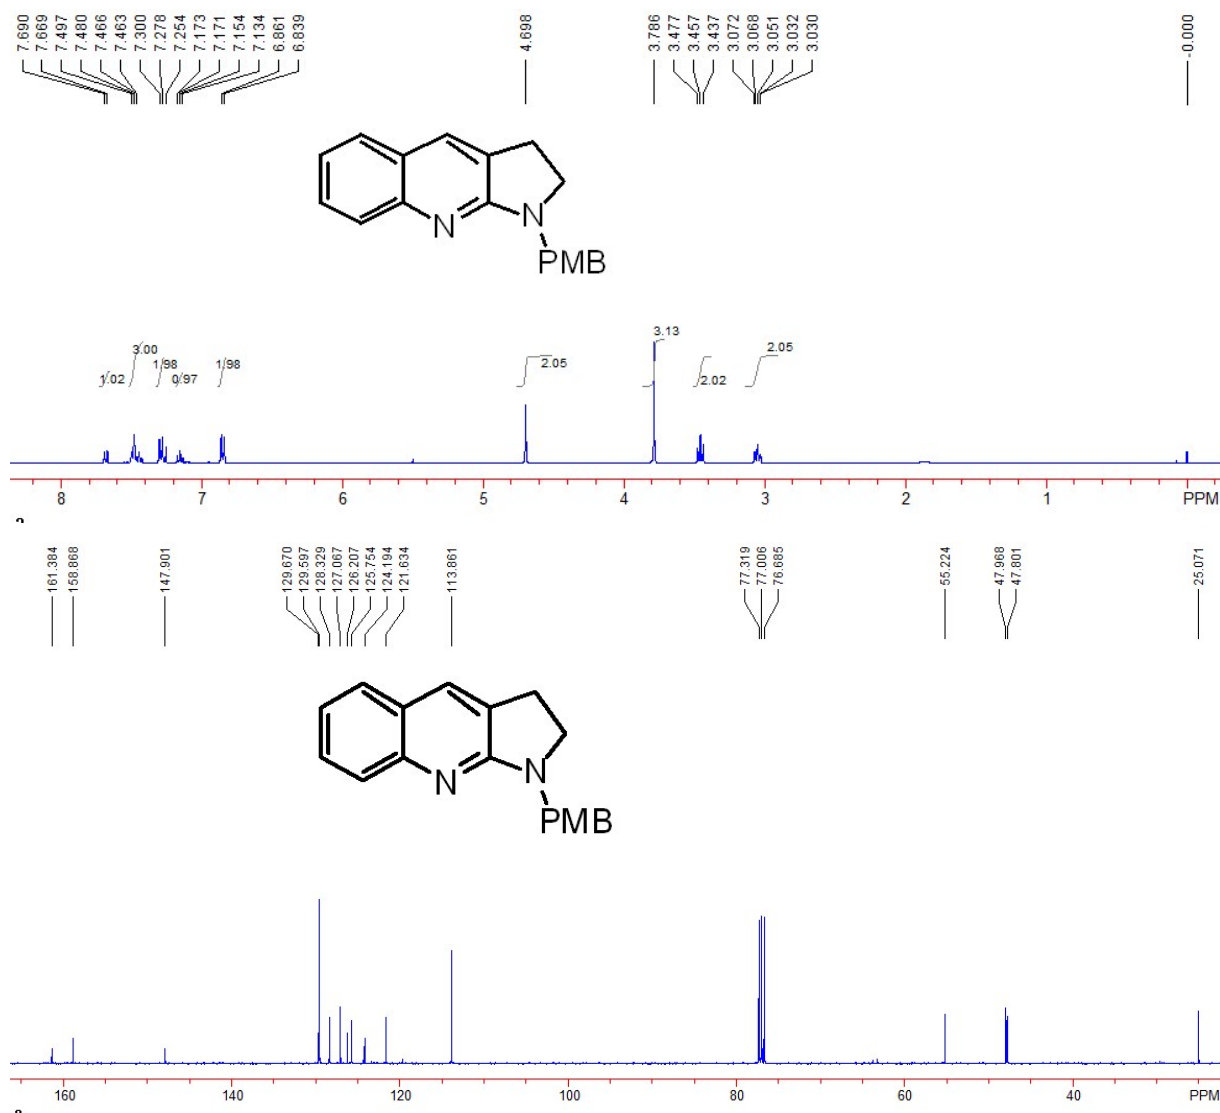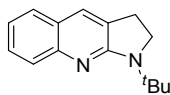

**Compound 2l:** 35 mg, 77%, A yellow solid, m.p. 99-101 °C; IR ( $CH_2Cl_2$ ):  $\nu$  2971, 2854, 1643, 1570, 1428, 1223, 753  $cm^{-1}$ ;  $^1H$  NMR (400 MHz,  $CDCl_3$ , TMS):  $\delta$  1.55 (s, 9H), 2.96 (td,  $J_1 = 8.0$  Hz,  $J_2 = 1.6$  Hz, 2H), 3.46 (t,  $J = 8.0$  Hz, 2H), 7.10-7.14 (m, 1H), 7.38-7.46 (m, 3H), 7.64 (d,  $J = 8.4$  Hz, 1H);  $^{13}C$  NMR (100 MHz,  $CDCl_3$ , TMS):  $\delta$  25.1, 27.0, 46.5, 54.4, 121.4, 123.5, 126.6, 126.7, 127.6, 127.8, 128.3, 147.9, 161.8; MS (ESI)  $m/z$ : 227.2 ( $M+H^+$ , 100); HRMS (ESI) Calcd. for  $C_{15}H_{19}N_2^+$  requires: 227.1543, found: 227.1543.

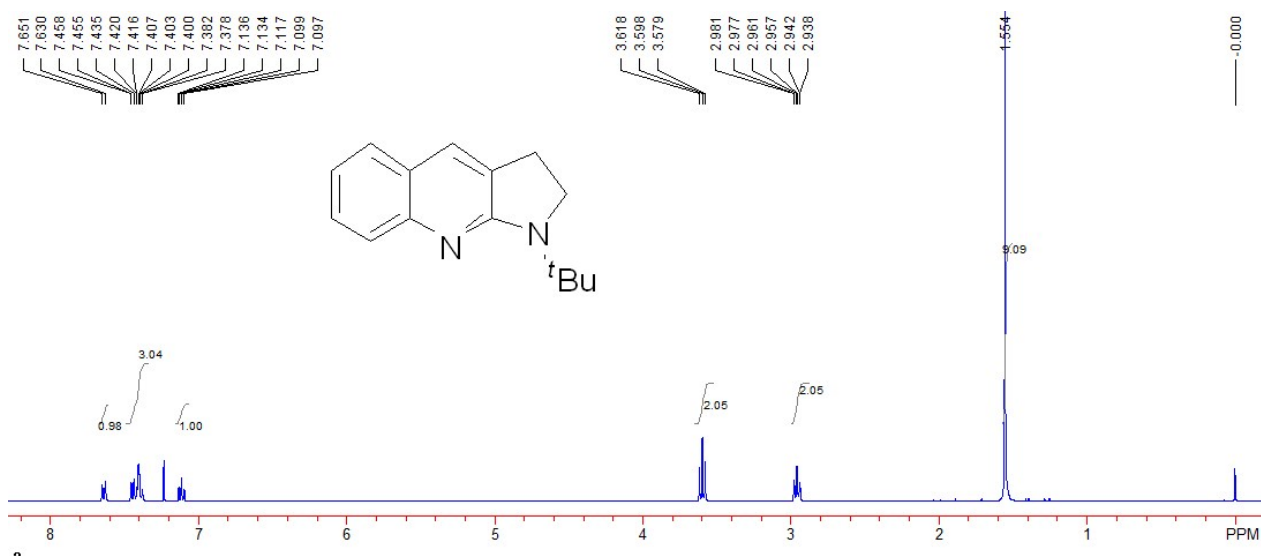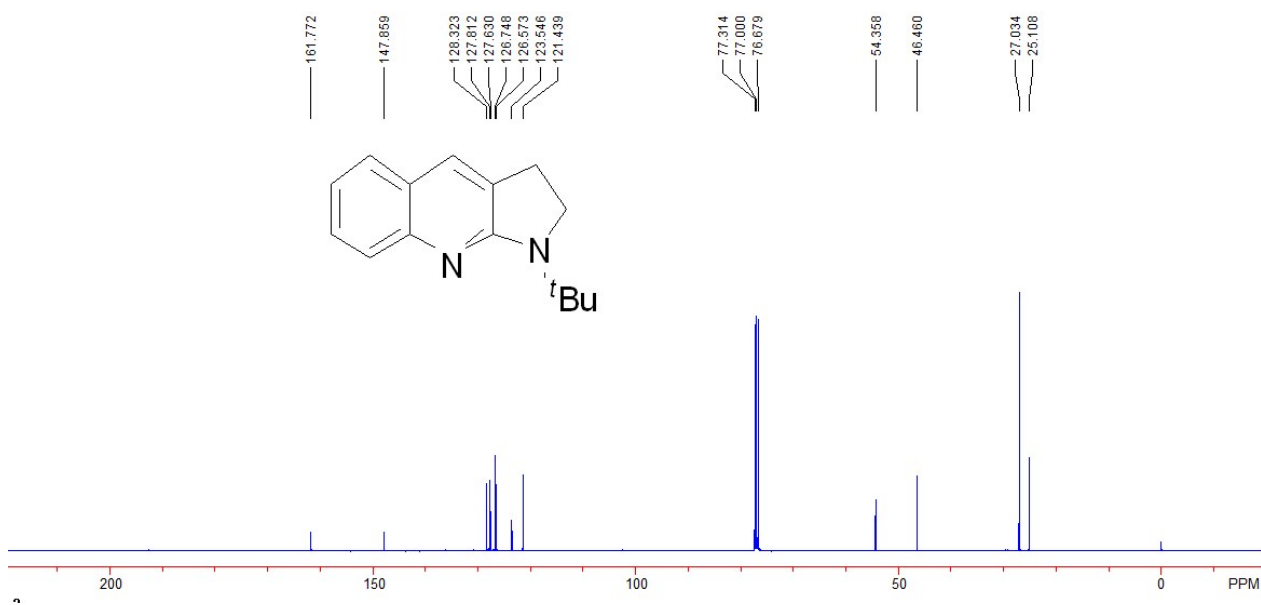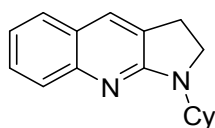

**Compound 2m:** 36 mg, 72%, A yellow solid, m.p. 152-154 °C; IR (CH<sub>2</sub>Cl<sub>2</sub>):  $\nu$  2929, 2853, 1641, 1573, 1495, 1438, 1309, 752 cm<sup>-1</sup>; <sup>1</sup>H NMR (400 MHz, CDCl<sub>3</sub>, TMS):  $\delta$  1.44-1.88 (m, 10H), 3.04-3.08 (m, 2H), 3.60 (t,  $J$  = 8.0 Hz, 2H), 4.21-4.27 (m, 1H), 7.08-7.12 (m, 1H), 7.38-7.45 (m, 3H), 7.62 (d,  $J$  = 8.0 Hz, 1H); <sup>13</sup>C NMR (100 MHz, CDCl<sub>3</sub>, TMS):  $\delta$  25.1, 25.6, 25.8, 29.8, 43.3, 51.6, 121.2, 124.0, 125.6, 126.8, 127.0, 128.1, 129.0, 148.1, 160.8; MS (ESI)  $m/z$ : 253.2 (M+H<sup>+</sup>, 100); HRMS (ESI) Calcd. for C<sub>17</sub>H<sub>21</sub>N<sub>2</sub><sup>+</sup> requires: 253.1699, found: 253.1699.

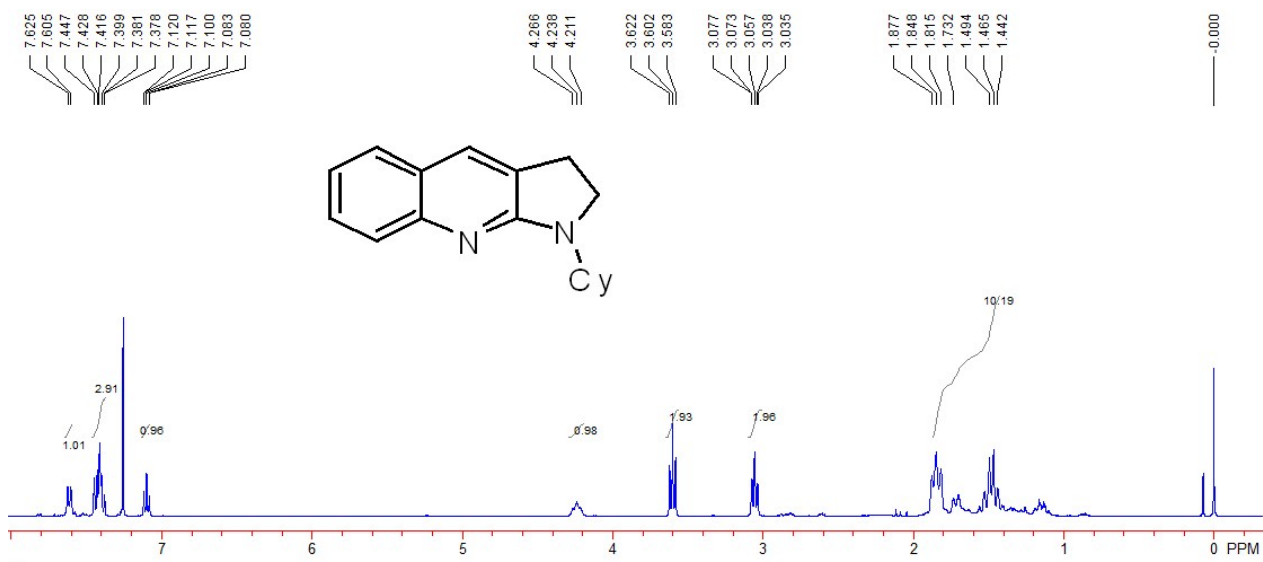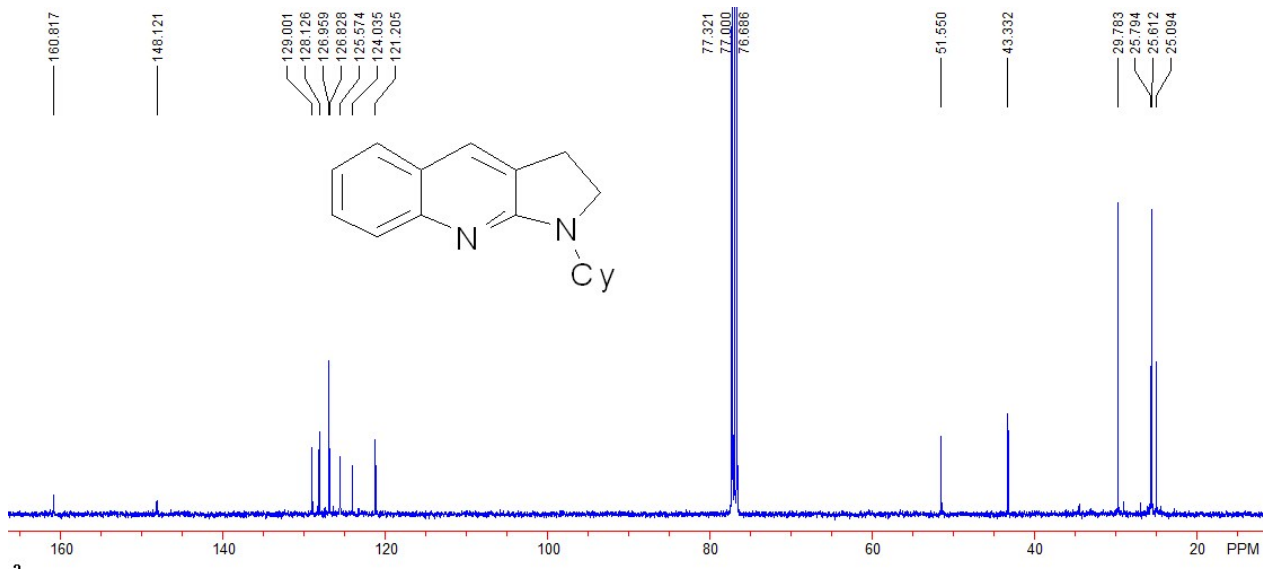



### Typical procedure for the synthesis of compound **2a** from Staudinger reduction

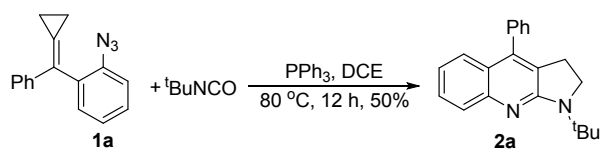

A solution of compound **1a** (0.1 mmol),  $\text{PPh}_3$  (39 mg, 0.15 mmol) and  $t\text{BuNCO}$  (35  $\mu\text{L}$ , 0.3 mmol) in dry DCE (1 mL) was stirred at  $80\text{ }^\circ\text{C}$  for 12 h. Then the solvent was removed under reduced pressure and the residue was purified by silica gel flash chromatography (eluent: petroleum ether / ethyl acetate = 30 / 1) to afford the product in 50% yield.

## Control experiment on how to get compounds **2a'** and **2a''**

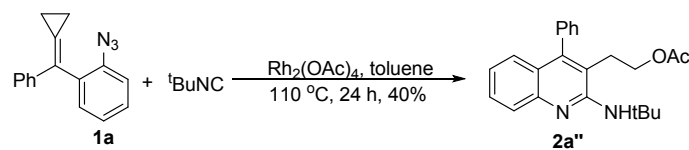

A solution of compound **1a** (0.2 mmol), isonitrile (1.0 mmol) and  $\text{Rh}_2(\text{OAc})_4$  (28 mg, 0.1 mmol) in dry toluene (2 mL) was stirred at 110 °C for 24 h. Then the solvent was removed under reduced pressure and the residue was purified by silica gel flash chromatography (eluent: petroleum ether / ethyl acetate = 30 / 1) to afford the product in 40% yield.

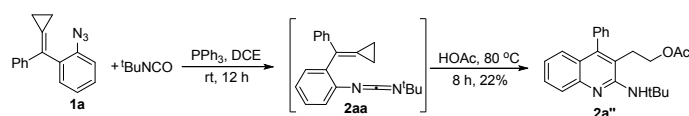

A solution of compound **1a** (0.1 mmol),  $\text{PPh}_3$  (39 mg, 0.15 mmol) and  $^t\text{BuNCO}$  (35  $\mu\text{L}$ , 0.3 mmol) in dry DCE (1 mL) was stirred at room temperature for 12 h. Then HOAc (6  $\mu\text{L}$ , 0.1 mmol) was added and the mixture was heated at 80 °C for another 8 h before the solvent was removed under reduced pressure and the residue was purified by silica gel flash chromatography (eluent: petroleum ether / ethyl acetate = 30 / 1) to afford the product in 22% yield.

This control experiment illustrated that the byproducts **2a'** and **2a''** were obtained by the reaction between the carbodiimide intermediates and the acids derived from Rh(II) catalysts.

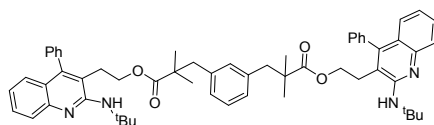

**Compound 2a'**: 4 mg, 4%, A yellow solid, m.p. 176-178 °C; IR ( $\text{CH}_2\text{Cl}_2$ ):  $\nu$  3407, 2966, 1716, 1589, 1414, 1124, 760  $\text{cm}^{-1}$ ;  $^1\text{H}$  NMR (400 MHz,  $\text{CDCl}_3$ , TMS):  $\delta$  1.09 (s, 12H), 1.65 (s, 18H), 2.58 (t,  $J = 8.4$  Hz, 4H), 2.74 (s, 4H), 3.99 (t,  $J = 8.4$  Hz, 4H), 5.71 (s, 2H), 6.81 (s, 1H), 6.85-6.88 (m, 2H), 6.96-7.03 (m, 5H), 7.19-7.21 (m, 4H), 7.44-7.50 (m, 8H), 7.71 (d,  $J = 8.4$  Hz, 2H);  $^{13}\text{C}$  NMR (100 MHz,  $\text{CDCl}_3$ , TMS):  $\delta$  24.9, 28.0, 29.3, 43.4, 45.8, 52.0, 62.5, 116.1, 121.4, 122.9, 126.2, 126.5, 127.5, 127.7, 128.3, 128.5, 129.0, 132.3, 137.2, 137.8, 146.8, 147.5, 154.8, 178.0; MS (ESI)  $m/z$ : 442.3 ( $\text{M}+2\text{H}^{2+}$ , 100); HRMS (ESI) Calcd. for  $\text{C}_{58}\text{H}_{68}\text{N}_4\text{O}_4^+$  requires: 442.2615, found: 442.2629.

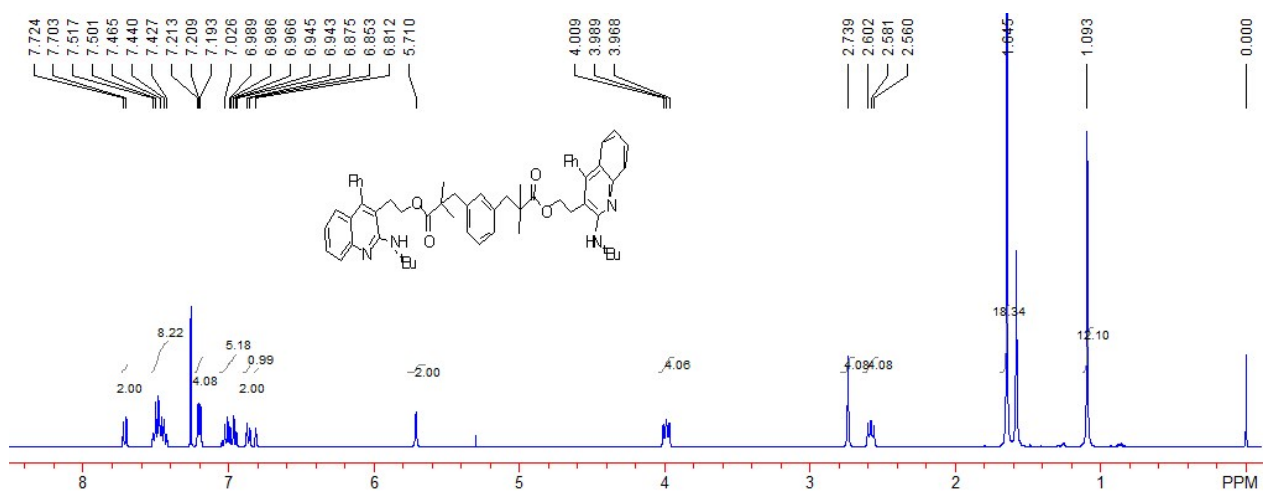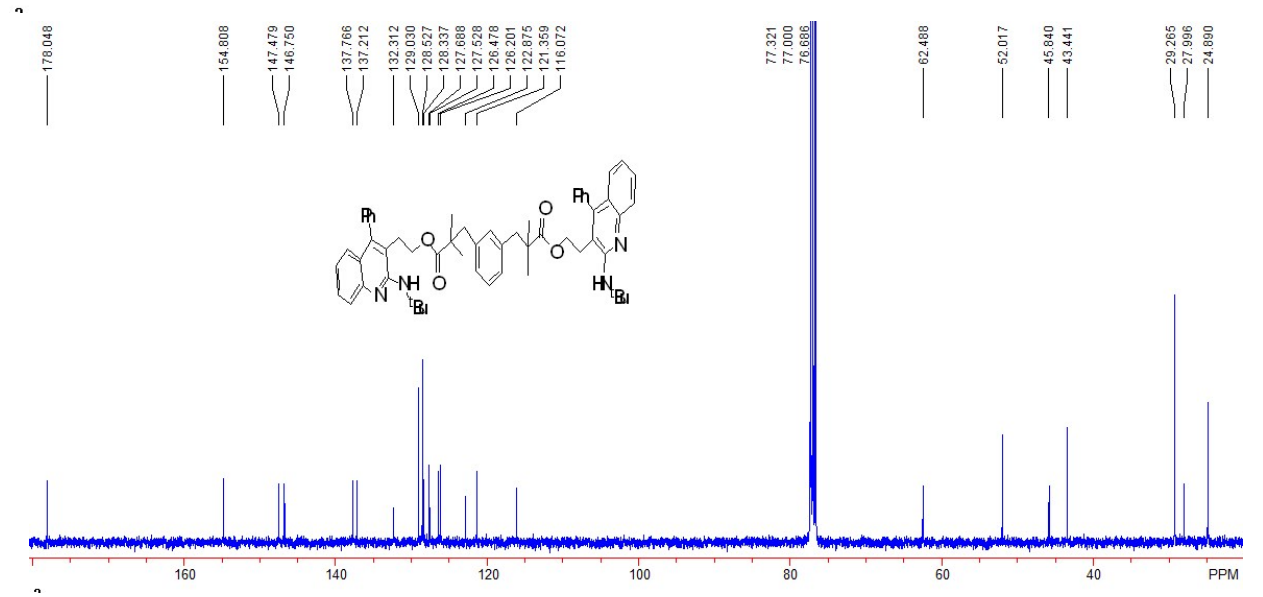

## Typical procedure for the synthesis of catalysts $\text{Rh}_2(\text{esp})_2(\text{CN}^t\text{Bu})_2$ and $\text{Rh}_2(\text{esp})_2(\text{CN}^t\text{Bu})$

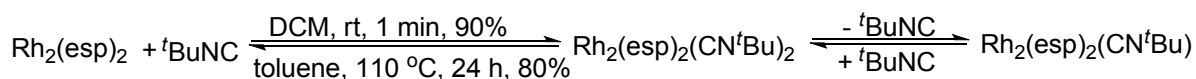

Compound  $\text{Rh}_2(\text{esp})_2$  (0.01 mmol) and  ${}^t\text{BuNC}$  (22  $\mu\text{L}$ , 0.2 mmol) were mixed in dry DCM (1 mL) at room temperature for 1 min. Then the solvent was removed under reduced pressure and the residue was purified by silica gel flash chromatography (eluent: petroleum ether / ethyl acetate = 5 / 1) to afford the product  $\text{Rh}_2(\text{esp})_2(\text{CN}^t\text{Bu})_2$  in 90% yield. Heated in toluene at 110  $^\circ\text{C}$  for 24 h,  $\text{Rh}_2(\text{esp})_2(\text{CN}^t\text{Bu})_2$  could be transformed back to  $\text{Rh}_2(\text{esp})_2$  in 80% yield. Interestingly,  $\text{Rh}_2(\text{esp})_2(\text{CN}^t\text{Bu})_2$  could be easily transformed to a more stable  $\text{Rh}_2(\text{esp})_2(\text{CN}^t\text{Bu})$  once put in air for 24 h.

The colour of  $\text{Rh}_2(\text{esp})_2$  is green.

The colour of  $\text{Rh}_2(\text{esp})_2(\text{CN}^t\text{Bu})_2$  is orange.

The colour of  $\text{Rh}_2(\text{esp})_2(\text{CN}^t\text{Bu})$  is purple.

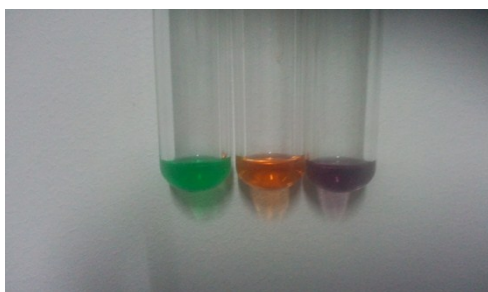

The UV/visible spectroscopy of these three catalysts:

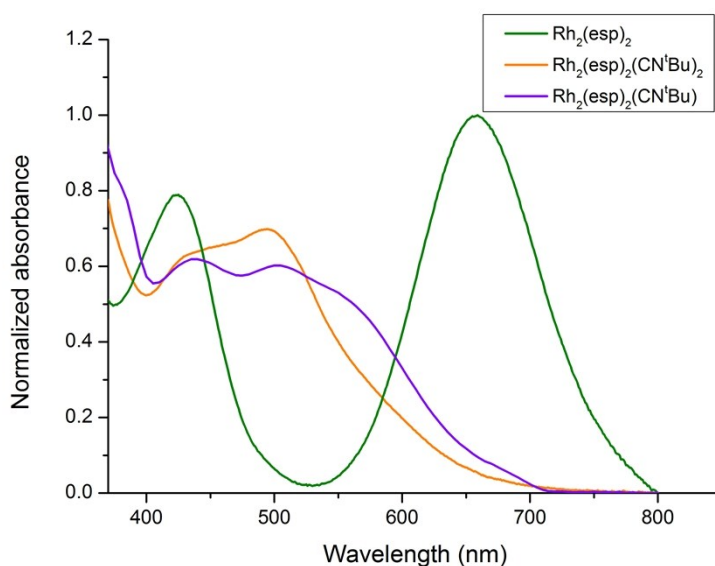

$\text{Rh}_2(\text{esp})_2(\text{CN}^t\text{Bu})_2$ :  $^1\text{H}$  NMR (400 MHz,  $\text{CDCl}_3$ , TMS):  $\delta$  0.95 (s, 24H), 1.69 (s, 18H), 2.60 (s, 8H), 6.79 (dd,  $J = 7.6$  Hz,  $J = 1.6$  Hz, 4H), 6.99-7.02 (m, 4H); HRMS (MALDI) Calcd. for  $\text{C}_{42}\text{H}_{59}\text{N}_2\text{O}_8\text{Rh}_2^+$  requires: 925.2376, found: 925.2403.

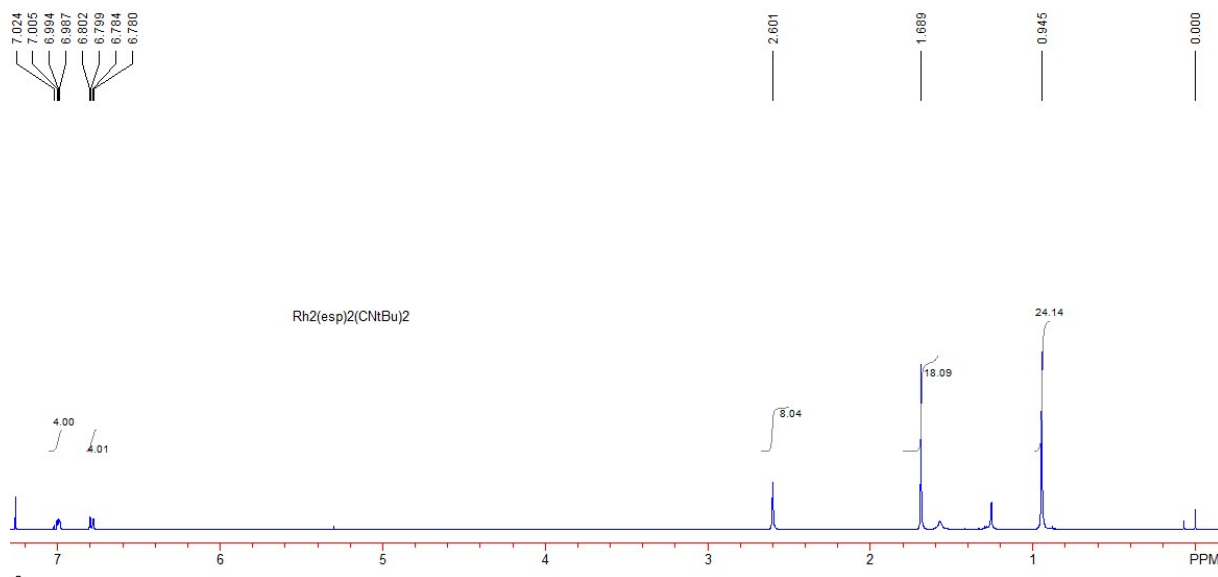

$\text{Rh}_2(\text{esp})_2(\text{CN}^i\text{Bu})$ :  $^1\text{H}$  NMR (400 MHz,  $\text{CDCl}_3$ , TMS):  $\delta$  0.97 (s, 24H), 1.71 (s, 9H), 2.61 (s, 8H), 6.81 (dd,  $J = 7.6$  Hz,  $J = 1.2$  Hz, 4H), 6.94 (s, 2H), 7.04 (d,  $J = 7.6$  Hz, 2H); HRMS (MALDI) Calcd. for  $\text{C}_{37}\text{H}_{50}\text{NO}_8\text{Rh}_2^+$  requires: 842.1641, found: 842.1694.

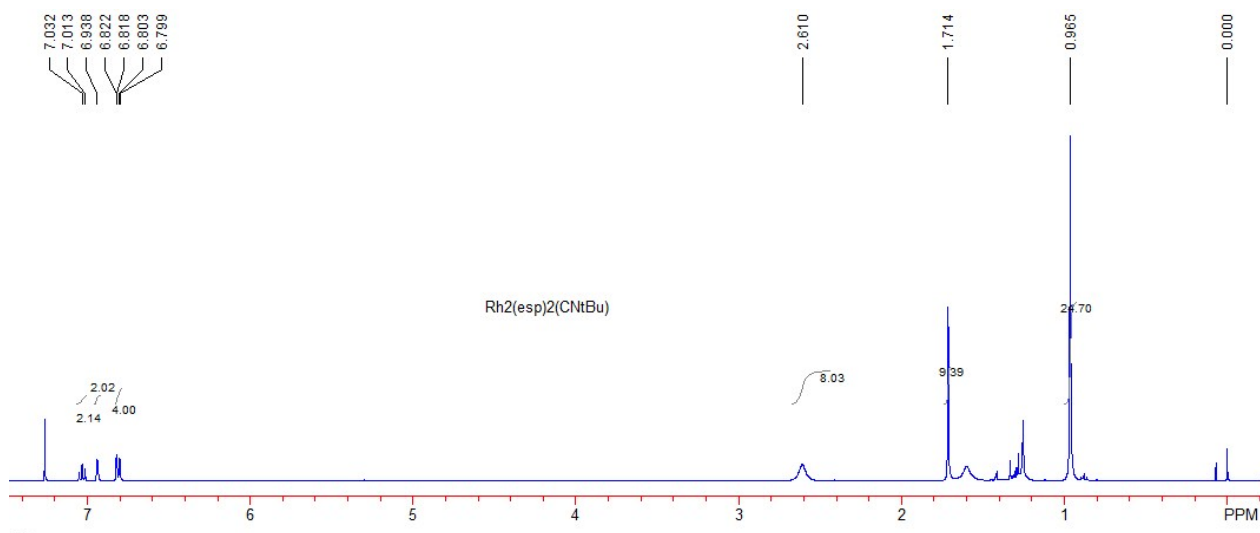

## Transformation of compounds 2a and 2k

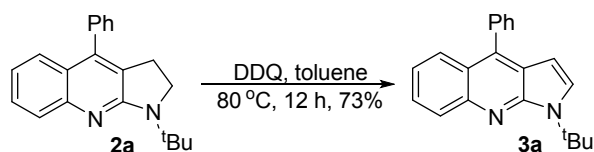

A solution of compound **2a** (30 mg, 0.1 mmol) and DDQ (44 mg, 0.2 mmol) in dry toluene (1 mL) was stirred at 80 °C for 12 h. Then the solvent was removed under reduced pressure and the residue was purified by silica gel flash chromatography (eluent: petroleum ether / ethyl acetate = 30 / 1) to afford the product **3a** in 73% yield.

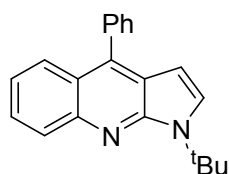

**Compound 3a:** 22 mg, 73%, A yellow solid, m.p. 128-130 °C; IR (CH<sub>2</sub>Cl<sub>2</sub>):  $\nu$  3059, 2922, 1742, 1598, 1390, 1228, 759 cm<sup>-1</sup>; <sup>1</sup>H NMR (400 MHz, CDCl<sub>3</sub>, TMS):  $\delta$  1.92 (s, 9H), 6.32 (d,  $J$  = 4.0 Hz, 1H), 7.29-7.33 (m, 1H), 7.49-7.62 (m, 7H), 7.90 (d,  $J$  = 8.0 Hz, 1H), 8.15 (d,  $J$  = 8.8 Hz, 1H); <sup>13</sup>C NMR (100 MHz, CDCl<sub>3</sub>, TMS):  $\delta$  29.2, 56.6, 97.4, 122.0, 122.3, 122.6, 125.6, 126.9, 127.8, 128.4, 129.0, 129.9, 130.3, 137.1, 138.5, 144.8, 149.2; MS (ESI)  $m/z$ : 301.2 (M+H<sup>+</sup>, 100); HRMS (ESI) Calcd. for C<sub>21</sub>H<sub>21</sub>N<sub>2</sub><sup>+</sup> requires: 301.1699, found: 301.1700.

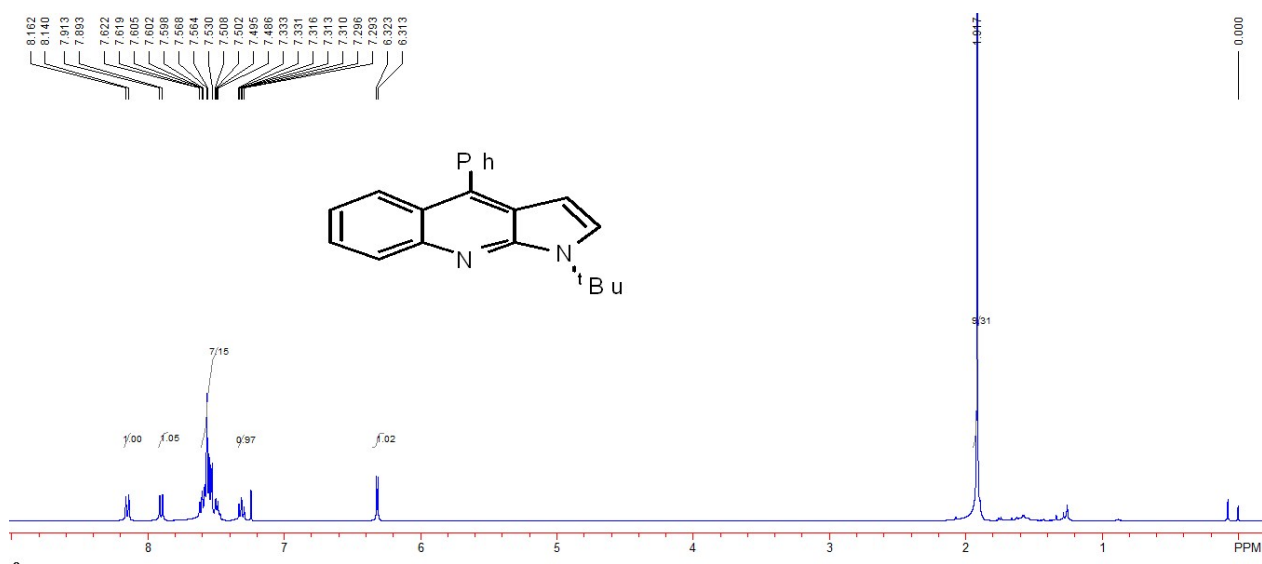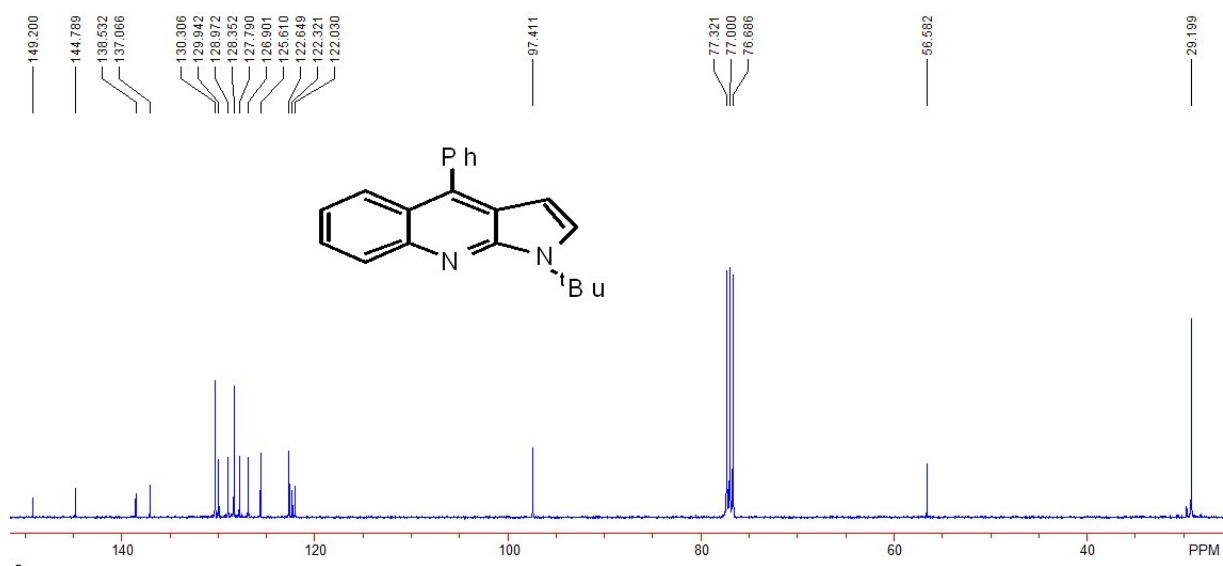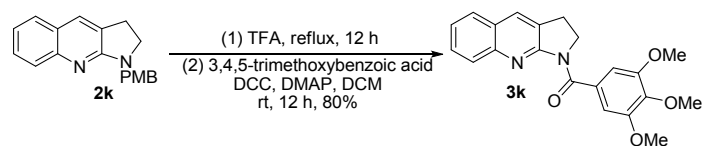

A solution of compound **2k** (45 mg, 0.15 mmol) in TFA (2 mL) was stirred at 75 °C for 12 h. Afterwards the mixture was added in saturated Na<sub>2</sub>CO<sub>3</sub> (10 mL), extracted with EtOAc (5 mL x 3), and washed by brine (5 mL). The combined extracts were dried over Na<sub>2</sub>SO<sub>4</sub>. Then the solvent was removed under reduced pressure and the obtained crude product was used for the next reaction without purification. A mixture of crude product (26 mg, 0.15 mmol), 3,4,5-trimethoxybenzoic acid (64 mg, 0.3 mmol), DCC (62 mg, 0.3 mmol) and DMAP (18 mg, 0.015 mmol) in DCM (2 mL) was stirred at room temperature under an N<sub>2</sub> atmosphere for 12 h. Then the solvent was removed under reduced pressure and the residue was purified by silica gel flash

chromatography (eluent: petroleum ether / ethyl acetate = 5 / 1) to afford the product **3k** in 80% yield.

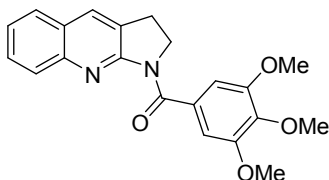

**Compound 3k:** 44 mg, 80%, A yellow solid, m.p. 152-154 °C; IR (CH<sub>2</sub>Cl<sub>2</sub>):  $\nu$  3059, 2922, 1742, 1598, 1390, 1228, 759 cm<sup>-1</sup>; <sup>1</sup>H NMR (400 MHz, CDCl<sub>3</sub>, TMS):  $\delta$  3.28 (t, *J* = 7.6 Hz, 2H), 3.80 (s, 6H), 3.95 (s, 3H), 4.31 (t, *J* = 7.6 Hz, 2H), 7.01 (s, 2H), 7.34-7.37 (m, 1H), 7.46-7.51 (m, 2H), 7.65 (d, *J* = 8.0 Hz, 1H), 7.86 (s, 1H); <sup>13</sup>C NMR (100 MHz, CDCl<sub>3</sub>, TMS):  $\delta$  24.4, 47.7, 56.2, 61.0, 106.9, 125.0, 125.7, 126.6, 127.0, 128.0, 129.0, 130.6, 132.1, 140.6, 146.0, 152.4, 155.1, 169.3; MS (ESI) *m/z*: 365.2 (M+H<sup>+</sup>, 100); HRMS (ESI) Calcd. for C<sub>21</sub>H<sub>21</sub>N<sub>2</sub>O<sub>4</sub><sup>+</sup> requires: 365.1496, found: 365.1502.

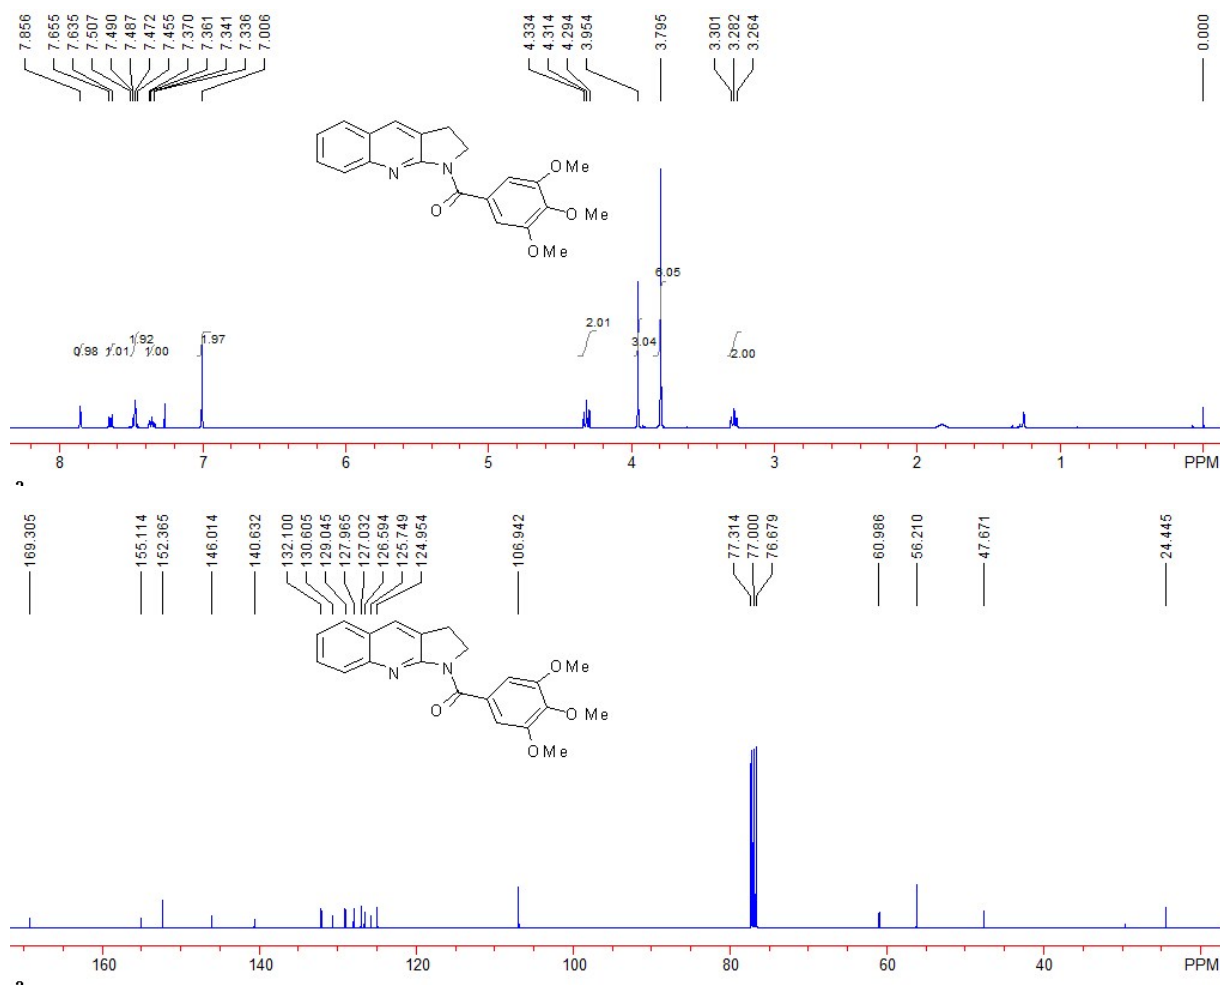



## The crystal data of **2d** and **2a'**

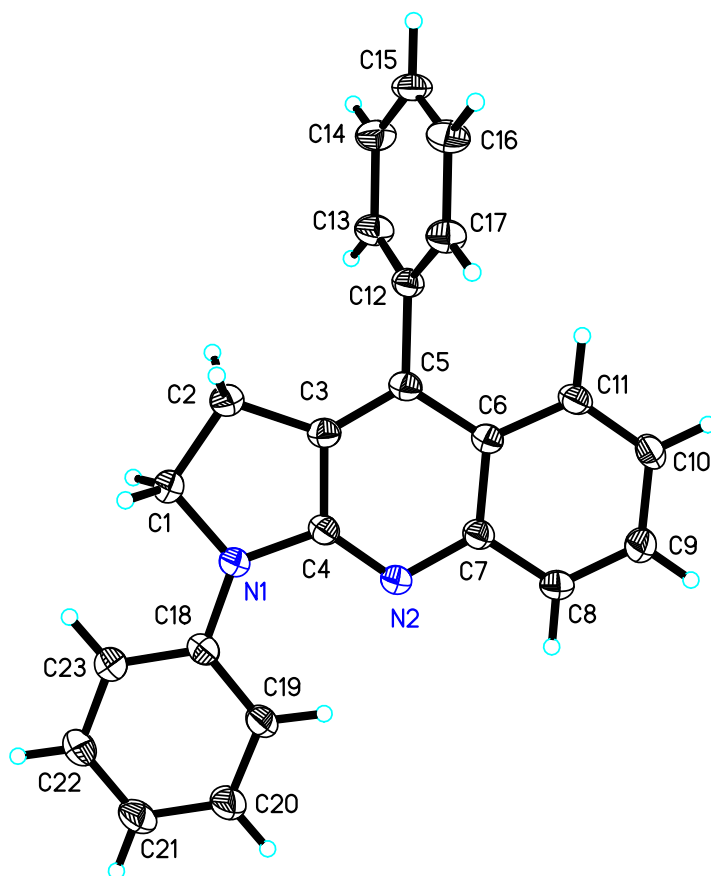

The crystal data of **2d** have been deposited in CCDC with number 1004408. Empirical Formula: Empirical formula  $C_{23}H_{19}N_2$ , Formula weight: 323.40, Temperature: 293(2)K, Wavelength 0.71073 Å, Crystal system: Triclinic, Space group: P-1, Unit cell dimensions:  $a = 6.2745(8)\text{Å}$ ,  $\alpha = 109.644(3)^\circ$ .  $b = 10.4378(12)\text{Å}$ ,  $\beta = 97.810(3)^\circ$ .  $c = 13.5235(16)\text{Å}$ ,  $\gamma = 90.942(3)^\circ$ . Volume:  $824.56(17)\text{Å}^3$ ,  $Z: 2$ , Density (calculated):  $1.303\text{ Mg/m}^3$ ,  $F(000): 342$ , Crystal size:  $0.157 \times 0.121 \times 0.076\text{ mm}^3$ , Final R indices [ $I > 2\sigma(I)$ ]  $R1 = 0.0491$ ,  $wR2 = 0.1168$ .

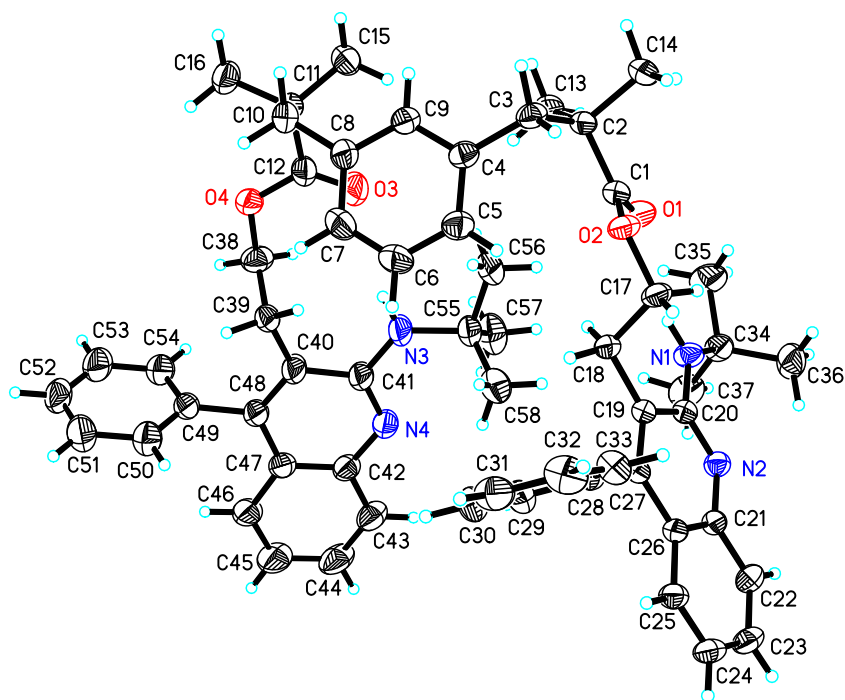

The crystal data of **2a'** have been deposited in CCDC with number 1021020. Empirical Formula:  $C_{58}H_{66}N_4O_4$ ; Formula Weight: 883.14; Crystal Color, Habit: colorless, Crystal Dimensions: 0.165 x 0.112 x 0.056 mm; Crystal System: Triclinic; Lattice Parameters:  $a = 10.37200(10)\text{\AA}$ ,  $b = 14.589(2)\text{\AA}$ ,  $c = 18.274(3)\text{\AA}$ ,  $\alpha = 81.682(3)^\circ$ ,  $\beta = 76.959(4)^\circ$ ,  $\gamma = 88.485(4)^\circ$ ,  $V = 2546.41(4)\text{\AA}^3$ ; Space group: P-1;  $Z = 2$ ;  $D_{calc} = 1.152\text{ g/cm}^3$ ;  $F_{000} = 948$ ; Final R indices [ $I > 2\sigma(I)$ ]  $R1 = 0.0444$ ,  $wR2 = 0.1255$ .
